# Supplementary material
Source: PubMed Central journal article supplement (PMC8033455)
Supplement: bloodBLD2020009088R1-suppl1.pdf [file bloodBLD2020009088R1-suppl1.pdf]

## Supplemental Information

### ***miR-15a/16-1* deletion in activated B-cells promotes plasma cell and mature B-cell neoplasms**

Tomasz Sewastianik,<sup>1,2\*</sup> Juerg R. Straubhaar,<sup>3</sup> Jian-Jun Zhao,<sup>4</sup> Mehmet Samur,<sup>4,6</sup> Keith Adler,<sup>1</sup> Helen E. Tanton,<sup>1</sup> Vignesh Shanmugam,<sup>7</sup> Omar Nadeem,<sup>4</sup> Peter S. Dennis,<sup>1</sup> Vinodh Pillai,<sup>7</sup> Jianli Wang,<sup>1</sup> Meng Jiang,<sup>1</sup> Jianhong Lin,<sup>4</sup> Ying Huang,<sup>1</sup> Daniel Brooks,<sup>8</sup> Mary Bouxsein,<sup>8</sup> David M. Dorfman,<sup>7</sup> Geraldine S. Pinkus,<sup>7</sup> Davide F. Robbiani,<sup>9</sup> Irene M. Ghobrial,<sup>4</sup> Bogdan Budnik,<sup>10</sup> Petr Jarolim,<sup>7</sup> Nikhil C. Munshi,<sup>4,11</sup> Kenneth C. Anderson,<sup>4,11</sup> and Ruben D. Carrasco<sup>1,7\*</sup>

<sup>1</sup>Department of Oncologic Pathology, Dana-Farber Cancer Institute, Harvard Medical School, Boston, MA, USA; <sup>2</sup>Department of Experimental Hematology, Institute of Hematology and Transfusion Medicine, Warsaw, Poland; <sup>3</sup>FAS Informatics, Harvard University, Cambridge, MA, USA; <sup>4</sup>Department of Medical Oncology, Dana-Farber Cancer Institute, Harvard Medical School, Boston, MA, USA; <sup>5</sup>Department of Data Sciences, Dana Farber Cancer Institute, Boston, MA, USA; <sup>6</sup>Department of Biostatistics, Harvard T.H. Chan School of Public Health, Boston, MA, USA; <sup>7</sup>Department of Pathology, Brigham & Women's Hospital, Harvard Medical School, Boston, MA, USA; <sup>8</sup>Center for Advanced Orthopedic Studies, Beth Israel-Deaconess Medical Center, Harvard Medical School, Boston, MA, USA; <sup>9</sup>Laboratory of Molecular Immunology, Rockefeller University, New York, NY, USA; <sup>10</sup>Mass Spectrometry and Proteomics Resource Laboratory, FAS Division of Science, Harvard University, Cambridge, MA, USA; <sup>11</sup>Jerome Lipper Center for Multiple Myeloma Research, Dana-Farber Cancer Institute, Harvard Medical School, Boston, MA, USA.

#### **Corresponding authors\*:**

Tomasz Sewastianik, address: Dana-Farber Cancer Institute, 450 Brookline Ave, Boston, MA 02215; email: Tomasz\_Sewastianik@DFCI.HARVARD.EDU

Ruben D. Carrasco, address: Dana-Farber Cancer Institute, 450 Brookline Ave, Boston, MA 02215; phone: 617-582-8159; fax: 617-582-8761; email: ruben\_carrasco@dfci.harvard.edu

## Supplemental Methods

### miR ISH, and IF/ISH double stains

For ISH, rehydrated slides were incubated with HCl (0.2M, RT, 20min), treated with proteinase K (100µg/ml, 37°C, 20min; Invitrogen), re-fixed with paraformaldehyde (PFA; 4% in PBS, RT, 5min), with each step followed by washing, and air-dried. Digoxigenin (DIG)-labeled locked-nucleic acid (LNA) probes (**supplemental Table 2**; Bio Basic) were hybridized in DIG Easy Hyb buffer (Roche) for 18h at 4°C, washed, blocked, and developed with anti-DIG-AP (Roche) and a solution of nitro blue tetrazolium chloride and 5-bromo-4-chloro-3-indolyl-phosphate (NBT/BCIP; Roche). The slides were counterstained with Fast Red (Sigma) or mounted without counterstaining. Expression of miR-15a and miR-16 was checked across mouse tissues using RT-qPCR and ISH, and muscle and thymus were used as negative and positive parallel controls, respectively (**supplemental Figure 8A-B**). Tissues from *WT* and *KO* mice were placed on a single paraffin block and processed in parallel. Control and malignant human tissues were likewise processed at the same time.

For miR-15a/16/CD138 IF/ISH double-staining, frozen human LN sections were fixed with 4% PFA for 30 min, washed, blocked with 5% BSA for 20 min, and stained with primary anti-CD138 antibody (#MCA2459GA, Bio-Rad Laboratories) for 18h at 4°C, then with secondary anti-mouse IgG Alexa Flour 488 conjugate (#A-11029, Invitrogen) for 2h at room temperature. Sections were counterstained with 4',6-diamidino-2-phenylindole (DAPI; Sigma), mounted using BrightMount medium (Abcam), and scanned in IF mode. Thereafter, coverslips were removed and sections were re-fixed in 10% formalin for 10 min, dried, baked, rehydrated, and processed according to the ISH protocol described above but without the counterstaining. Slides were next scanned in the bright-field mode.

Given better epitope preservation, miR-16/CD10 and miR-16/PD-1 ISH/IHC double-staining was performed on FFPE sections according to standard ISH protocol, followed by standard IHC protocol and development with PermaRed/AP.

### **IF, IHC, and ISH image acquisition and analyses**

IHC and ISH images were acquired using Leica DM2000 microscope (Leica Microsystems) unless otherwise specified. Ki-67, cleaved caspase-3, CD138, and VEGF-A stainings in spleens of immunized *WT* and *KO* mice were scanned using Vectra 2 Intelligent Slide Analysis System (Caliper LifeSciences). Intensity of pERK staining, area of GCs, and percentage of CD138<sup>+</sup> PCs were assessed using HALO Image Analysis Software (PerkinElmer). GC area was normalized to the total tissue area. Percentage of cells positive for cleaved caspase-3 was assessed using inForm Cell Analysis software (PerkinElmer).

For IF/ISH and IHC/ISH double stains, slides were scanned using the Vectra 2 Intelligent Slide Analysis System. IF/ISH binary images were overlaid according to slide coordinates using Photoshop (Adobe). Red was employed for miR ISH, green for CD138 IF, and blue for DAPI IF channels in both individual and merged images. For miR-15a, miR-16, and CD138 IHC colocalization, serial consecutive sections were scanned using ScanScope slide scanner (Aperio).

EP cases (n=11) were scored into three categories 'strong', 'weak', and 'negative' as compared to normal nodal PCs independently by two certified pathologists.

### **Immunoglobulin heavy chain (*IgH*) variable region mutation analysis**

*IgH* variable regions were amplified from genomic DNA by PCR using Phusion High-Fidelity PCR Master Mix (New England Biolabs) and appropriate primers (**supplemental Table 2**). Clonal bands were extracted from agarose (Sigma) gels with a QIAquick Gel Extraction Kit (Qiagen) and cloned with a Zero Blunt TOPO PCR Cloning Kit (Invitrogen). Plasmids were prepared using a QIAprep Spin Miniprep Kit (Qiagen), sequenced, and analyzed using the international ImMunoGeneTics information system.<sup>1</sup>

## Whole-exome sequencing

For mouse analysis WES was performed on one EP and one DLBCL FFPE samples as well as one FFPE spleen from a healthy animal as a control as described;<sup>2</sup> except, 200ng of DNA was used for libraries preparation and sequenced on NovaSeq 6000 (Illumina). Mean target coverage was 123X. Reads were processed and analyzed as described.<sup>2</sup> Mutations were compared to human lymphoid malignancies from cBioPortal and mapped on proteins with maftools.<sup>3-17</sup>

Human WES was performed on eleven FFPE samples from primary EP cases and one control. Libraries were prepared using KAPA HyperPrep Kit (Roche). Sequencing libraries were constructed using SureSelect Human All Exon V5 plus POPv3.1 SV ONLY 3191451 spike-in and SureSelect XT HS Hybrid Capture kit (Agilent), pooled and sequenced using NovaSeq 6000 (Illumina). Mean target coverage was 152X (range 107-212X). Paired-end reads were aligned to the reference human genome using BWA-mem.<sup>18</sup> Duplicated reads were marked and base quality score recalibration was performed using MarkDuplicates and ApplyBQSR with GATK4.<sup>19,20</sup> Mutect2 was used to call single nucleotide variants (SNVs) and small insertions and deletions (indels). Raw mutation calls then filtered using FilterMutectCalls from GATK4 and only the mutations PASS all the filters applied by FilterMutectCalls and has at least 10X coverage for tumor samples extracted with bcftools for further analysis. SNVs and indels were annotated using Variant Effect Predictor (VEP) from Ensembl and converted to MAF files using VCF2MAF.<sup>21,22</sup> dbSNP v154 were used filter SNP sites and the population variant resource containing allele-specific frequencies from gnomAD to filter alleles.<sup>23,24</sup> COSMIC and cBioPortal databases were used to identify somatic mutations.<sup>4,25,26</sup> Chromosome arm level copy number variants were identified using RobustCNV, which relies on localized changes in the mapping depth of sequenced reads to identify changes in copy number at the loci sampled during targeted capture. Mutation calls were validated using Sanger sequencing. Single nucleotide and copy number variants were compared to MM and visualized using maftools and R.<sup>3,27-30</sup> Pathways were assigned using OncogenicPathways function.<sup>3</sup> Chromosomal rearrangements were visualized

using Circos and ClicO FS.<sup>31,32</sup> Genetic alterations were clustered using 1-pearson correlation and visualized using Morpheus (<https://software.broadinstitute.org/morpheus>).

### **Amplicon sequencing**

*Gna13*, *Hist1h1c*, *Hist1h1e*, and *Pim1* coding regions were amplified from genomic DNA (*Hist1h1c* and *Hist1h1e*) or cDNA (*Gna13* and *Pim1*) using Q5 DNA Polymerase (New England Biolabs) and purified using QIAquick Gel Extraction Kit (Qiagen). Amplicons were fragmented to approximately 250bp using Covaris adaptive focused acoustics on the M220 platform. Illumina sequencing libraries were prepared using Swift S2 Acel reagents on a Biomek i7 liquid handling platform. Finished libraries were quantified by Qubit fluorometer, Agilent TapeStation 2200, and RT-qPCR using the Kapa Biosystems library quantification kit according to manufacturer's protocols. Uniquely indexed libraries were pooled in equimolar ratios and sequenced on an Illumina MiSeq with paired-end 150bp reads by the Dana-Farber Cancer Institute Molecular Biology Core Facilities.

Sequencing data were aligned to the *Mus musculus* genome version 10 (mm10) using bwa-mem (v0.7.17) aligner<sup>18</sup> and converted to sorted BAM files with samtools (v1.10).<sup>33</sup> Duplicate reads in the BAM files were marked and tagged using Picard functionalities (v2.23.4). The base qualities of each read were recalibrated against known SNP databases using GATK (v4.1.6.0).<sup>19</sup> Variants were identified using MuTect2 (GATK) in 'single sample' mode with default parameters. The resulting variants were annotated with Ensembl Variant Effect Predictor (VEP) (v99) and reformatted with vcf2maf package (v1.6.16).<sup>21,22</sup>

### **X-ray, serum protein electrophoresis (SPE), and enzyme-linked immunosorbent assay (ELISA)**

Radiographs of mouse forelimbs were acquired with a Faxitron X-ray cabinet (Model 43855A, Hewlett-Packard), on Oncology EDR2 film (Carestream) with 76 kVp x-ray tube energy, exposure times of 6 or 4 minutes (with or without musculature, respectively), and no magnification.

Plasma was isolated by centrifugation in Microtainer tubes (BD) and analyzed on SPIFE Serum Protein Gels with SPIFE 3000 (Helena Laboratories). Mouse VEGF (Sigma-Aldrich), IgM, and IgG (Innovative Research) ELISA Kits were used to assess plasma VEGF-A and immunoglobulin concentrations according to the manufacturers' protocols.

### **Proteomics**

Sorted GC B-cells were washed in PBS and snap frozen in  $-80^{\circ}\text{C}$ . Next, samples were resuspended in 5% sodium dodecyl sulfate and subjected to complete lysis and DNA shearing using a S220 Focused ultrasonicator (Covaris) in 1ml glass vials; reduced (tris(2-carboxyethyl)phosphine added to 20mM,  $90^{\circ}\text{C}$  for 20 minutes); cooled to room temperature (RT); and alkylated (iodoacetamide added to 50mM, RT in the dark for 30 minutes). Individual samples were subjected to detergent removal and enzymatic digestion using the S-Trap (ProtiFi); dried to near full dryness on a SpeedVac (Eppendorf); and resuspended in 100ul 50mM triethylammonium bicarbonate. Subsequently, samples were labeled with TMT10plex Isobaric Label Reagent Set (Thermo Scientific) for 1 hour at RT. Reaction was quenched with the addition of 5% hydroxylamine for 15 min. Labeled samples were then combined and fully dried in the SpeedVac. Combined peptides were separated on 1200 HPLC system (Agilent) using PolyWAX LP column (PolyLC; 200x2.1 mm,  $5\mu\text{m}$ ,  $300\text{\AA}$ ) running under ERLIC (Electrostatic Repulsion-Hydrophilic Interaction Chromatography) mode conditions. Peptides were separated across 90 min gradient of buffer A (90% Acetonitrile (ACN), 0.1% Acetic Acid) and 0% to 75 % buffer B (30% Acetonitrile, 0.1% Formic Acid) with 20 fractions collected by time. Each fraction was dried in SpeedVac and re-suspended in 0.1% formic acid solution.

Each sample was submitted for single LC-MS/MS run on an LTQ Orbitrap Elite (Thermo Fischer) equipped with NanoAcquity HPLC pump (Waters). Peptides were separated in a 100  $\mu\text{m}$  inner diameter microcapillary trapping column packed first with approximately 5 cm of C18 Reprisil resin ( $5\mu\text{m}$ ,  $100\text{\AA}$ , Dr. Maisch GmbH, Germany) followed by analytical column  $\sim 20$  cm of Reprisil

resin (1.8  $\mu\text{m}$ , 200  $\text{\AA}$ , Dr. Maisch GmbH, Germany). Separation was achieved by a gradient of 5–27% ACN in 0.1% formic acid over 90 min at 200 nl/min. Electrospray ionization was enabled by applying a voltage of 1.8 kV using a home-made electrode junction at the end of the microcapillary column and sprayed from fused silica pico tips (New Objective). The LTQ Orbitrap Elite was operated in data-dependent mode. The mass spectrometry survey scan was performed in the Orbitrap in the range of 400–1800 m/z at a resolution of  $6 \times 10^4$ , followed by the selection of the twenty most intense ions (TOP20) for CID-MS2 fragmentation in the ion trap using a precursor isolation width window of 2 m/z, AGC setting of 10,000, and a maximum ion accumulation of 200 ms. Singly charged ion species were not subjected to CID fragmentation. Normalized collision energy was set to 35 V and an activation time of 10 ms. Ions in a 10 ppm m/z window around ions selected for MS2 were excluded from further selection for fragmentation for 60 s. The same TOP20 ions were subjected to HCD MS2 event in Orbitrap part of the instrument. The fragment ion isolation width was set to 0.7 m/z, AGC was set to 50,000, the maximum ion time was 200 ms, normalized collision energy was set to 27V and an activation time of 1 ms for each HCD MS2 scan.

Raw data were submitted for analysis in Proteome Discoverer 2.4 (PD; Thermo Scientific) software. Assignment of MS/MS spectra was performed using the Sequest HT algorithm by searching the data against a protein sequence database including all entries from the Mouse Uniprot database (SwissProt 2017) and other known contaminants. Sequest HT searches were performed using a 20ppm precursor ion tolerance and requiring each peptides N/C termini to adhere with trypsin protease specificity, while allowing up to two missed cleavages. 10-plex TMT tags on peptide N termini and lysine residues (+229.162932 Da) was set as static modifications while methionine oxidation (+15.99492 Da) was set as variable modification. MS2 spectra assignment FDR of 1% on protein level was achieved by applying the target-decoy database search. Filtering was performed using a Percolator.<sup>34</sup> For quantification, a 0.02 m/z window centered on the theoretical m/z value of each of the ten reporter ions and the intensity of the signal

closest to the theoretical  $m/z$  value was recorded. The total signal intensity across all peptides quantified was summed for each TMT channel, and all intensity values were adjusted to account for potentially uneven TMT labeling and/or sample handling variance for each labeled channel. The spectrum search results with PD were read into R<sup>27</sup> and filtered against a list of common contaminants. Data structures provided by the MSnbase library<sup>35</sup> in R/Bioconductor<sup>36</sup> were used to represent the filtered matrix, which provided convenient functions for data manipulation and visualization. Data matrix was normalized with a MSnbase wrapper function that uses the vsn R/Bioconductor library.<sup>37</sup> Normalization step was validated with a principal component analysis (PCA) and the first 2 components were used to visually inspect the separation between *WT* and *KO* samples. Unwanted variation was removed by adding latent model terms to the model equation. The additional parameters were determined from the residuals of a regression analysis. Proteins differentially expressed (DE) between *WT* and *KO* samples were the result of applying a linear model to the abundance data and contrasting on the *WT* versus the *KO* using the limma library<sup>38</sup> of R/Bioconductor.

miR target enrichment was performed on proteins upregulated (FDR<0.1) in GC B-cells from *KO* compared to *WT* mice using MIENTURNET and TargetScan database.<sup>39,40</sup> Metaspace<sup>41</sup> was used for functional enrichment and interactome analysis of DE proteins (FDR<0.1) using recommended settings. Differential expression analysis of microarray data was used to determine genes upregulated in light zone (LZ up) vs dark zone (DZ up; GSE38696,<sup>42</sup> FDR<0.1; top 150 fold-changed probes, given the limited number of DE genes between LZ and DZ cells) and GC (GC up) vs plasma cells (PC up; GSE11961,<sup>43</sup> FDR<0.01, top 400 fold-changed probes). Gene set enrichment analysis<sup>44</sup> of these genesets and the 'hallmark' genesets from MSigDB<sup>45</sup> was run using recommended settings. R<sup>27</sup> packages were used to visualize the data: pheatmap<sup>46</sup> for heatmap, ggplot2<sup>28</sup> for PCA, DE, and GSEA bubble plots as well as miR target enrichment bar plot, and Rtoolbox (<https://github.com/PeeperLab/Rtoolbox>) for GSEA mountain plots.



## Supplemental Tables

Supplemental Table 1. Primary antibodies

| Antigen                          | Application            | Source                    | Catalog number |
|----------------------------------|------------------------|---------------------------|----------------|
| <b>B220</b> (mouse)              | IHC                    | BD Biosciences            | 550286         |
| <b>BCL2</b> (mouse)              | IHC/<br>Immunoblotting | Abcam                     | ab182858       |
| <b>BCL6</b> (mouse)              | IHC                    | Santa Cruz Biotechnology  | sc-858         |
| <b>CD10</b> (human)              | IHC                    | Leica Biosystems          | NCL-L-CD10-270 |
| <b>CD138</b> (human)             | IHC                    | Beckman Coulter           | PN IM2757      |
| <b>CD138</b> (mouse)             | IHC                    | BD Biosciences            | 553712         |
| <b>CD21</b> (mouse)              | IHC                    | Dako                      | M0784          |
| <b>CD3</b> (mouse)               | IHC                    | Dako                      | A0452          |
| <b>CD5</b> (mouse)               | IHC                    | Sino Biological           | 50403-RP02-50  |
| <b>Cleaved caspase 3</b> (mouse) | IHC                    | Cell Signaling Technology | 9664           |
| <b>Cre</b> (mouse)               | IHC                    | Millipore                 | 69050          |
| <b>pERK</b> (mouse)              | IHC                    | Cell Signaling Technology | 4370           |
| <b>IgG</b> (mouse)               | IHC                    | SouthernBiotech           | 1070-01        |
| <b>IgM</b> (mouse)               | IHC                    | SouthernBiotech           | 1020-01        |
| <b>Kappa</b> (mouse)             | IHC                    | SouthernBiotech           | 1170-01        |
| <b>Ki-67</b> (mouse)             | IHC                    | Vector Laboratories       | VP-K451        |
| <b>Lambda</b> (mouse)            | IHC                    | SouthernBiotech           | 1175-01        |
| <b>MYC</b> (mouse)               | IHC                    | Abcam                     | ab32072        |
| <b>PAX5</b> (mouse)              | IHC                    | Cell Signaling Technology | 12709          |
| <b>PD-1</b> (human)              | IHC                    | Cell Marque               | 315M-95        |
| <b>VEGF-A</b> (mouse)            | IHC                    | Abcam                     | ab52917        |
| <b>CD138</b> (human)             | IF                     | Bio-Rad Laboratories      | MCA2459GA      |
| <b>B220</b> (mouse)              | FACS                   | BD Biosciences            | 553087         |
| <b>CD138</b> (mouse)             | FACS                   | BD Biosciences            | 553714         |
| <b>CD21/CD35</b> (mouse)         | FACS                   | BioLegend                 | 123418         |
| <b>CD23</b> (mouse)              | FACS                   | BioLegend                 | 101618         |
| <b>CD3</b> (mouse)               | FACS                   | eBioscience               | 17-0031-83     |
| <b>CD38</b> (mouse)              | FACS                   | BioLegend                 | 102720         |
| <b>CD86</b> (mouse)              | FACS                   | BioLegend                 | 105007         |
| <b>CD95</b> (mouse)              | FACS                   | BD Biosciences            | 557653         |
| <b>CXCR4</b> (mouse)             | FACS                   | eBioscience               | 17-9991-80     |
| <b>Actin</b> (mouse)             | Immunoblotting         | Santa Cruz Biotechnology  | sc-1615        |
| <b>CHEK1</b> (mouse)             | Immunoblotting         | Santa Cruz Biotechnology  | sc-8408        |
| <b>Cyclin-D2</b> (mouse)         | Immunoblotting         | Santa Cruz Biotechnology  | sc-593         |
| <b>Cyclin-E1</b> (mouse)         | Immunoblotting         | Cell Signaling Technology | 20808          |

**Supplemental Table 2. Oligonucleotide sequences and TaqMan assays**

| <b>Oligonucleotide</b>                | <b>Application</b> | <b>Sequence (5' → 3')/Assay ID</b> | <b>Source</b> |
|---------------------------------------|--------------------|------------------------------------|---------------|
| <b>LNA-miR-15a</b>                    | ISH                | DIG-CACaaAcCatTatgTgctGcta         | Bio Basic     |
| <b>LNA-miR-15b</b>                    | ISH                | DIG-TGTaaAcCatGatgTgctGcta         | Bio Basic     |
| <b>LNA-miR-16</b>                     | ISH                | DIG-cgcCaatAtTtAcGtgCtGcTa         | Bio Basic     |
| <b>V<sub>H</sub>J558a</b> (forward)   | Mutation analysis  | SAGGTCCAGCTGCAGCAGTCTGG            | IDT           |
| <b>V<sub>H</sub>Q52</b> (forward)     | Mutation analysis  | CAGGTGCAGCTGAARCAGTCA              | IDT           |
| <b>V<sub>H</sub>36-60/4</b> (forward) | Mutation analysis  | GAGGTGMAGCTTCYSGAGTC               | IDT           |
| <b>V<sub>H</sub>7183b</b> (forward)   | Mutation analysis  | GTGAAGCCTGGAGGGTCCC                | IDT           |
| <b>V<sub>H</sub>7183c</b> (forward)   | Mutation analysis  | GGCTTAGTGMAGCCTGGAGG               | IDT           |
| <b>V<sub>H</sub>6/7</b> (forward)     | Mutation analysis  | GAGGTGAAGCTKGYGGAGTCT              | IDT           |
| <b>V<sub>H</sub>Gam3.8</b> (forward)  | Mutation analysis  | CAGATCCAGTTGGTRCAGTCT              | IDT           |
| <b>JH4int2</b> (reverse)              | Mutation analysis  | ACTATCCCTCCAGCCATAGG               | IDT           |
| <b>miR-15a</b>                        | RT-qPCR            | 000389                             | TaqMan        |
| <b>miR-15b</b>                        | RT-qPCR            | 000390                             | TaqMan        |
| <b>miR-16</b>                         | RT-qPCR            | 000391                             | TaqMan        |
| <b>snoRNA234</b>                      | RT-qPCR            | 001234                             | TaqMan        |
| <b>U6</b>                             | RT-qPCR            | 001973                             | TaqMan        |

**Supplemental Table 3. Differentially expressed proteins between GC B-cells from KO and WT mice (FDR<0.1)**

| <b>Protein ID</b> | <b>logFC</b> | <b>P.Value</b> | <b>adj.P.Val</b> |
|-------------------|--------------|----------------|------------------|
| Q8BX57            | 0.542415296  | 6.56E-08       | 0.000245625      |
| Q8R2K4            | -0.285471243 | 1.90E-07       | 0.000245625      |
| Q920A7            | -0.331438319 | 1.70E-07       | 0.000245625      |
| P58871            | -0.455588746 | 6.76E-07       | 0.000655451      |
| Q61704            | 0.338861714  | 1.30E-06       | 0.001010369      |
| Q9D084            | 0.568352367  | 6.76E-06       | 0.002623497      |
| Q8BG32            | -0.155876073 | 6.44E-06       | 0.002623497      |
| Q9CRC8            | -0.184341255 | 4.52E-06       | 0.002623497      |
| P61358            | -0.186470332 | 5.10E-06       | 0.002623497      |
| Q8K4Q7            | -0.247010724 | 6.37E-06       | 0.002623497      |
| Q9D187            | 0.208342195  | 8.28E-06       | 0.002921554      |
| Q8R4K2            | -0.346631241 | 1.23E-05       | 0.003961302      |
| P40336            | 0.373021651  | 1.82E-05       | 0.004151638      |
| Q9DB40            | 0.214146466  | 1.78E-05       | 0.004151638      |
| Q63844            | 0.1694589    | 1.68E-05       | 0.004151638      |
| Q9CR11            | 0.161355898  | 1.61E-05       | 0.004151638      |
| Q9R0Q6            | -0.202665845 | 1.69E-05       | 0.004151638      |
| P97465            | 0.195506441  | 2.10E-05       | 0.004427469      |
| Q8CE64            | -0.193364589 | 2.17E-05       | 0.004427469      |
| Q99PT1            | 0.160027541  | 2.53E-05       | 0.004471782      |
| P15508            | 0.148931249  | 2.47E-05       | 0.004471782      |
| Q8K3H0            | -0.231713971 | 2.54E-05       | 0.004471782      |
| Q60649            | -0.249692844 | 2.70E-05       | 0.004561472      |
| P35980            | -0.170808869 | 2.89E-05       | 0.004606872      |
| Q9D8V0            | -0.296361201 | 2.97E-05       | 0.004606872      |
| Q80U49            | 0.119550921  | 4.24E-05       | 0.006329608      |
| Q8BFQ8            | 0.131647128  | 4.50E-05       | 0.006470541      |
| Q9CR80            | 0.119737325  | 4.68E-05       | 0.006489895      |
| Q923D2            | 0.143728952  | 6.34E-05       | 0.008091648      |
| P23198            | 0.134750463  | 7.09E-05       | 0.008091648      |
| Q9D1R9            | -0.11248519  | 7.03E-05       | 0.008091648      |
| Q922X9            | -0.166441294 | 6.67E-05       | 0.008091648      |
| Q7TSJ6            | -0.189477062 | 6.32E-05       | 0.008091648      |
| Q99KN2            | -0.447081691 | 6.73E-05       | 0.008091648      |
| P21107            | 0.216614289  | 8.64E-05       | 0.00894771       |
| P49710            | 0.148514472  | 8.53E-05       | 0.00894771       |
| Q9JIH2            | 0.134846018  | 8.76E-05       | 0.00894771       |
| Q9QZE7            | -0.376461444 | 8.25E-05       | 0.00894771       |
| Q497H0            | 0.141426005  | 9.07E-05       | 0.009026114      |
| Q9D8T2            | 0.210358071  | 9.81E-05       | 0.009172107      |
| Q8K1L5            | 0.181516079  | 0.000106343    | 0.009172107      |
| Q9DBU0            | 0.163428184  | 0.00010493     | 0.009172107      |
| A2AR02            | 0.132090828  | 0.000109733    | 0.009172107      |
| P42232            | -0.184751234 | 0.000107574    | 0.009172107      |
| Q6GYP7            | -0.189412181 | 0.000111105    | 0.009172107      |
| Q9R0P5            | -0.206914708 | 0.000102056    | 0.009172107      |
| Q8CGP0            | -0.211811826 | 9.49E-05       | 0.009172107      |
| Q8K0U4            | 0.321382672  | 0.000116581    | 0.009185377      |
| P29758            | 0.108501667  | 0.000115006    | 0.009185377      |
| E9Q7E2            | -0.162418952 | 0.000120736    | 0.009185377      |
| Q8C1Q6            | -0.256954824 | 0.000119864    | 0.009185377      |
| Q3U821            | -0.301225318 | 0.000124133    | 0.009262247      |
| O70220            | 0.247119532  | 0.000136553    | 0.009996713      |
| Q61712            | 0.214340713  | 0.00016185     | 0.010106135      |
| Q91W18            | 0.189921179  | 0.000160539    | 0.010106135      |
| P09926            | 0.171627331  | 0.000163556    | 0.010106135      |

---

|         |              |             |             |
|---------|--------------|-------------|-------------|
| P26369  | 0.157728877  | 0.000167637 | 0.010106135 |
| Q60821  | 0.151884858  | 0.000148637 | 0.010106135 |
| P17225  | -0.118632206 | 0.000149473 | 0.010106135 |
| Q8CBW3  | -0.14796551  | 0.000147843 | 0.010106135 |
| Q9JHK4  | -0.17078366  | 0.000169304 | 0.010106135 |
| Q9CZM2  | -0.179404557 | 0.000160563 | 0.010106135 |
| Q8K4B0  | -0.180070899 | 0.000169214 | 0.010106135 |
| Q9CR02  | -0.292703602 | 0.000144054 | 0.010106135 |
| Q8BPB0  | -0.356532075 | 0.000156748 | 0.010106135 |
| Q9CQ36  | -0.332649006 | 0.000177238 | 0.010419426 |
| P97386  | -0.233801309 | 0.000184344 | 0.010675452 |
| E9Q309  | -0.126994093 | 0.000190617 | 0.010718777 |
| Q8BH59  | -0.205371277 | 0.000188227 | 0.010718777 |
| Q6ZQ08  | -0.141262364 | 0.000197663 | 0.010956187 |
| Q8VE97  | 0.123729211  | 0.000211487 | 0.011557314 |
| Q99P21  | 0.378562956  | 0.00022909  | 0.01156051  |
| Q80VR2  | 0.210521757  | 0.000216144 | 0.01156051  |
| Q9CXG9  | 0.176755978  | 0.000217564 | 0.01156051  |
| Q8JZK9  | 0.131030072  | 0.000226906 | 0.01156051  |
| O35955  | 0.1306033    | 0.000229423 | 0.01156051  |
| Q9CR57  | -0.135680775 | 0.000228869 | 0.01156051  |
| Q02819  | 0.126544114  | 0.000233327 | 0.011606506 |
| Q8VE92  | 0.160112671  | 0.000238213 | 0.011697957 |
| O70338  | -0.177785165 | 0.000241195 | 0.011697957 |
| Q61599  | 0.173687646  | 0.000269903 | 0.012928692 |
| Q91Z53  | 0.203369854  | 0.000277632 | 0.012965045 |
| Q9DBM1  | -0.125241979 | 0.000284028 | 0.012965045 |
| Q11011  | -0.144971699 | 0.000283552 | 0.012965045 |
| P97930  | -0.176025734 | 0.000279128 | 0.012965045 |
| B2RQC6  | -0.173075057 | 0.00030122  | 0.013589916 |
| Q6PDY2  | 0.125748856  | 0.000309872 | 0.013662558 |
| Q8BSS9  | 0.1036784    | 0.000309112 | 0.013662558 |
| O88291  | 0.107013765  | 0.000320383 | 0.013967278 |
| A6H8H2  | -0.269568561 | 0.000329324 | 0.014197532 |
| Q64518  | -0.112139491 | 0.000340034 | 0.014498148 |
| P19253  | -0.149169478 | 0.000349589 | 0.014743538 |
| P80315  | -0.115437966 | 0.000359794 | 0.014919153 |
| Q9Z0R0  | -0.387038739 | 0.000361443 | 0.014919153 |
| Q9JK23  | -0.151592783 | 0.00037444  | 0.015133611 |
| Q8R060  | -0.256585221 | 0.000371335 | 0.015133611 |
| O88967  | -0.260847166 | 0.000388865 | 0.015554585 |
| P83917  | 0.200211029  | 0.00039816  | 0.015763885 |
| Q8K4K6  | 0.204824107  | 0.000433665 | 0.015992387 |
| P57759  | 0.124598898  | 0.00041572  | 0.015992387 |
| Q6AZB0  | 0.108796615  | 0.000431074 | 0.015992387 |
| Q9D136  | 0.100236368  | 0.000436905 | 0.015992387 |
| Q5SWD9  | -0.121356536 | 0.000428636 | 0.015992387 |
| Q9C XK9 | -0.125989241 | 0.000417379 | 0.015992387 |
| Q6ZWN5  | -0.157611456 | 0.0004234   | 0.015992387 |
| Q7TPS5  | -0.342690017 | 0.000422002 | 0.015992387 |
| Q9WV60  | -0.108499243 | 0.000444458 | 0.016116808 |
| Q62093  | 0.223990518  | 0.000457393 | 0.016133506 |
| P46467  | 0.129387347  | 0.000456711 | 0.016133506 |
| Q9Z108  | -0.153361547 | 0.000455859 | 0.016133506 |
| O08677  | 0.593865491  | 0.000486844 | 0.016608513 |
| P61082  | 0.121145793  | 0.000476873 | 0.016608513 |
| Q3UKJ7  | -0.105978061 | 0.000487982 | 0.016608513 |
| Q80TP3  | -0.188186849 | 0.000481994 | 0.016608513 |
| Q8BQ30  | 0.275653979  | 0.000493177 | 0.016639365 |
| Q8R3F5  | 0.168859229  | 0.000509609 | 0.016943923 |
| Q8BHJ9  | 0.132980532  | 0.000510938 | 0.016943923 |
| Q91ZE0  | 0.189633751  | 0.000526295 | 0.017106234 |

---

|        |              |             |             |
|--------|--------------|-------------|-------------|
| Q8BGC0 | 0.148308803  | 0.00052336  | 0.017106234 |
| Q8VEM8 | -0.277825009 | 0.000529059 | 0.017106234 |
| Q3UHC0 | 0.214365811  | 0.000539717 | 0.017220964 |
| Q8CG46 | -0.130189064 | 0.000541484 | 0.017220964 |
| Q8BX10 | -0.165243231 | 0.000565376 | 0.01783461  |
| Q6DVA0 | -0.135428299 | 0.000588221 | 0.018405629 |
| Q6ZPV2 | 0.169805253  | 0.000603234 | 0.018724379 |
| O54781 | -0.213299845 | 0.000615482 | 0.018952928 |
| Q9DCK4 | -0.111217767 | 0.000622497 | 0.019018021 |
| Q68FL6 | -0.173502505 | 0.000632568 | 0.019174704 |
| Q9CT10 | 0.10147327   | 0.000645556 | 0.019230646 |
| Q5BLK4 | -0.144053916 | 0.000649282 | 0.019230646 |
| Q8BIY3 | -0.179022888 | 0.000642186 | 0.019230646 |
| Q5SZV5 | 0.166614207  | 0.000668392 | 0.019286103 |
| P27546 | 0.120720002  | 0.000671037 | 0.019286103 |
| Q8C863 | -0.212230472 | 0.000656622 | 0.019286103 |
| Q9D3E6 | -0.345172044 | 0.000662891 | 0.019286103 |
| P42669 | 0.099455769  | 0.000678401 | 0.019354383 |
| Q9JL60 | 0.338490872  | 0.000687791 | 0.019381609 |
| Q5XJY4 | 0.222616657  | 0.000689346 | 0.019381609 |
| P42125 | 0.148420589  | 0.000710162 | 0.01982324  |
| Q9JMD3 | 0.192206498  | 0.000735033 | 0.020307249 |
| Q7TNE3 | 0.085125541  | 0.00073797  | 0.020307249 |
| Q3TIR1 | -0.691197969 | 0.000746708 | 0.020403009 |
| Q6PDG5 | 0.080703585  | 0.000752928 | 0.020429086 |
| P50396 | 0.143609075  | 0.000761546 | 0.020519425 |
| O54956 | -0.110319078 | 0.000775502 | 0.020751358 |
| Q9DBC3 | 0.10064754   | 0.000787412 | 0.020925733 |
| Q99LX0 | 0.168845263  | 0.000795875 | 0.021006774 |
| Q7TSZ8 | -0.320931369 | 0.000802426 | 0.021036576 |
| Q9CSH3 | -0.123949427 | 0.000826921 | 0.021398634 |
| Q9D7B6 | -0.132675303 | 0.000827267 | 0.021398634 |
| Q9D8T7 | -0.162586183 | 0.000833081 | 0.021406332 |
| P27005 | 0.462478258  | 0.000854122 | 0.021802596 |
| Q8BK58 | -0.122791002 | 0.000881976 | 0.022366444 |
| P01942 | 0.1840168    | 0.000892937 | 0.022497362 |
| Q3U3D7 | 0.133658297  | 0.000900246 | 0.022535201 |
| P97352 | 0.217408725  | 0.0009211   | 0.022909418 |
| O35654 | -0.089972405 | 0.000942274 | 0.02325275  |
| P24270 | -0.170981684 | 0.000951802 | 0.02325275  |
| P62849 | -0.285177956 | 0.000952883 | 0.02325275  |
| A6X935 | 0.260098429  | 0.000989286 | 0.023952252 |
| Q8BK72 | -0.146045895 | 0.000993895 | 0.023952252 |
| Q80X41 | -0.14233827  | 0.001001927 | 0.023996773 |
| Q99J10 | 0.104535936  | 0.001016    | 0.024035609 |
| Q64311 | -0.097832301 | 0.001022133 | 0.024035609 |
| B1AXP6 | -0.200852221 | 0.001011868 | 0.024035609 |
| Q9Z1R3 | 0.280543585  | 0.001040027 | 0.024163511 |
| P14115 | -0.1153189   | 0.0010378   | 0.024163511 |
| P12970 | -0.143873459 | 0.001048039 | 0.024204712 |
| P52633 | -0.103850853 | 0.001076698 | 0.024719451 |
| Q8CGC7 | -0.112471473 | 0.001084745 | 0.024757713 |
| P01887 | 0.270779373  | 0.001111781 | 0.024791432 |
| Q8R010 | -0.101662421 | 0.001095662 | 0.024791432 |
| Q62432 | -0.112364272 | 0.001101553 | 0.024791432 |
| Q9D8W5 | -0.164370643 | 0.001108765 | 0.024791432 |
| Q8K0E8 | 0.237975776  | 0.001135916 | 0.025119138 |
| Q91VR2 | -0.178220342 | 0.001139425 | 0.025119138 |
| Q62172 | 0.260194092  | 0.001200992 | 0.025745019 |
| Q3UE31 | 0.219128023  | 0.001197794 | 0.025745019 |
| Q9D8E6 | -0.150133023 | 0.001182768 | 0.025745019 |
| Q8VIN1 | -0.229406681 | 0.001192575 | 0.025745019 |

---

|               |              |             |             |
|---------------|--------------|-------------|-------------|
| <b>Q9D2X8</b> | -0.280501787 | 0.001197913 | 0.025745019 |
| <b>P70460</b> | 0.085491194  | 0.001246574 | 0.026575308 |
| <b>Q8K3I9</b> | -0.178143934 | 0.001254969 | 0.026608082 |
| <b>P25444</b> | -0.191080784 | 0.001270842 | 0.026798196 |
| <b>Q9Z0G2</b> | 0.128743974  | 0.001278591 | 0.026815858 |
| <b>Q9D7G0</b> | 0.152851352  | 0.001293357 | 0.026835435 |
| <b>P62911</b> | -0.133497626 | 0.001288049 | 0.026835435 |
| <b>P53026</b> | -0.182215186 | 0.001302706 | 0.026885633 |
| <b>Q6P5U7</b> | -0.192040388 | 0.001312339 | 0.026941131 |
| <b>A2A6A1</b> | 0.146937966  | 0.001329709 | 0.027154047 |
| <b>Q99246</b> | 0.282387427  | 0.001342752 | 0.027276857 |
| <b>Q6R2P8</b> | 0.19020155   | 0.001369735 | 0.027666798 |
| <b>Q6A028</b> | 0.112719749  | 0.001376209 | 0.027666798 |
| <b>Q921H9</b> | 0.373292994  | 0.001426397 | 0.027935664 |
| <b>Q9Z131</b> | 0.231285802  | 0.001437544 | 0.027935664 |
| <b>Q6NV83</b> | 0.196188034  | 0.001439983 | 0.027935664 |
| <b>Q6PF93</b> | -0.090882016 | 0.001426838 | 0.027935664 |
| <b>Q6PDJ6</b> | -0.145411348 | 0.001407387 | 0.027935664 |
| <b>Q9QXG2</b> | -0.199040741 | 0.001422877 | 0.027935664 |
| <b>Q3UR50</b> | -0.345342843 | 0.001437215 | 0.027935664 |
| <b>O09130</b> | 0.255992176  | 0.001492425 | 0.028095841 |
| <b>Q08879</b> | 0.194542759  | 0.001498914 | 0.028095841 |
| <b>P97318</b> | 0.114690398  | 0.001488443 | 0.028095841 |
| <b>Q8CJ40</b> | 0.10394367   | 0.001490366 | 0.028095841 |
| <b>Q9JJ80</b> | -0.120822529 | 0.001527031 | 0.028095841 |
| <b>P97789</b> | -0.139642321 | 0.001527892 | 0.028095841 |
| <b>P20664</b> | -0.144854176 | 0.001459931 | 0.028095841 |
| <b>Q9CQQ7</b> | -0.198722501 | 0.001478755 | 0.028095841 |
| <b>P61514</b> | -0.205991411 | 0.001526818 | 0.028095841 |
| <b>P28659</b> | -0.248474313 | 0.001520423 | 0.028095841 |
| <b>Q9WV66</b> | -0.264225509 | 0.001525086 | 0.028095841 |
| <b>Q8BUH8</b> | 0.46612036   | 0.00155154  | 0.028130727 |
| <b>Q9Z1J3</b> | 0.104235134  | 0.001548503 | 0.028130727 |
| <b>Q99KK1</b> | -0.250126404 | 0.001540554 | 0.028130727 |
| <b>P55302</b> | 0.366441245  | 0.001578265 | 0.028168494 |
| <b>E9PZM4</b> | 0.220031122  | 0.001574082 | 0.028168494 |
| <b>Q9WUQ2</b> | 0.213100019  | 0.001587976 | 0.028168494 |
| <b>A2AKB4</b> | 0.1848618    | 0.001586813 | 0.028168494 |
| <b>Q8BGB5</b> | 0.100751317  | 0.001589923 | 0.028168494 |
| <b>E9Q8I9</b> | 0.352962337  | 0.001620154 | 0.028310974 |
| <b>Q9Z1R2</b> | 0.115529543  | 0.001627412 | 0.028310974 |
| <b>Q8BWW4</b> | -0.10020929  | 0.001634448 | 0.028310974 |
| <b>Q7TPV4</b> | -0.128187777 | 0.00162413  | 0.028310974 |
| <b>Q8R1J3</b> | -0.144539204 | 0.001617632 | 0.028310974 |
| <b>P56390</b> | 0.115069389  | 0.001651646 | 0.028481712 |
| <b>Q9QZE5</b> | -0.123035679 | 0.001665762 | 0.028598037 |
| <b>P62267</b> | -0.122522135 | 0.001687247 | 0.028839293 |
| <b>O88491</b> | -0.082385944 | 0.00172978  | 0.029436605 |
| <b>Q8CCS6</b> | 0.202609745  | 0.001764519 | 0.029896648 |
| <b>P11983</b> | -0.162100801 | 0.001773635 | 0.029920449 |
| <b>P14733</b> | 0.098140742  | 0.001793185 | 0.030119305 |
| <b>Q99MS7</b> | 0.125481495  | 0.001844375 | 0.030845581 |
| <b>Q8BKC5</b> | -0.177761028 | 0.001852943 | 0.030855875 |
| <b>Q8BH04</b> | 0.118655018  | 0.001911747 | 0.031699051 |
| <b>Q62431</b> | -0.129425677 | 0.001922814 | 0.031746889 |
| <b>Q8BT60</b> | 0.138944682  | 0.001954613 | 0.031983969 |
| <b>Q9Z2Q5</b> | -0.115258579 | 0.001985528 | 0.031983969 |
| <b>P27512</b> | -0.125787102 | 0.001985501 | 0.031983969 |
| <b>Q99PW4</b> | -0.140158746 | 0.001987418 | 0.031983969 |
| <b>P47963</b> | -0.147829292 | 0.001994876 | 0.031983969 |
| <b>Q99L04</b> | -0.227142244 | 0.001988258 | 0.031983969 |
| <b>Q9Z2X8</b> | -0.252546241 | 0.001988546 | 0.031983969 |

---

---

|               |              |             |             |
|---------------|--------------|-------------|-------------|
| <b>Q3U1J4</b> | 0.12107813   | 0.002006715 | 0.032041383 |
| <b>Q8BG05</b> | 0.121338151  | 0.00203793  | 0.032300056 |
| <b>Q3TX08</b> | -0.08689659  | 0.002043713 | 0.032300056 |
| <b>Q8CCB4</b> | -0.139549108 | 0.00204789  | 0.032300056 |
| <b>P31725</b> | 0.385334148  | 0.002061825 | 0.032388175 |
| <b>Q9QXE7</b> | -0.208172232 | 0.002078278 | 0.032514996 |
| <b>P25206</b> | -0.088731431 | 0.002105832 | 0.032813771 |
| <b>Q8CHW4</b> | -0.113784507 | 0.002144139 | 0.033056255 |
| <b>Q80UY1</b> | -0.259911891 | 0.002142667 | 0.033056255 |
| <b>Q05816</b> | -0.27020152  | 0.002146953 | 0.033056255 |
| <b>Q6IRU2</b> | 0.107495609  | 0.00216382  | 0.033184276 |
| <b>Q78IK4</b> | -0.169863474 | 0.002176667 | 0.033249872 |
| <b>P20065</b> | 0.176011535  | 0.002186603 | 0.033270658 |
| <b>Q8BVY0</b> | -0.112390356 | 0.002218849 | 0.033629434 |
| <b>O55187</b> | 0.101723962  | 0.002230136 | 0.033668978 |
| <b>Q91W98</b> | -0.10430512  | 0.002245593 | 0.033770932 |
| <b>P63328</b> | 0.192607733  | 0.002271955 | 0.033971718 |
| <b>O70493</b> | -0.10333523  | 0.002276455 | 0.033971718 |
| <b>Q9CWU9</b> | -0.12847936  | 0.002298121 | 0.034163634 |
| <b>Q6P1G2</b> | -0.131796504 | 0.002316354 | 0.034303253 |
| <b>P50543</b> | 0.284915117  | 0.002351337 | 0.034688925 |
| <b>P12894</b> | 0.159775962  | 0.002360855 | 0.034697413 |
| <b>Q80ZW2</b> | -0.198251173 | 0.002419646 | 0.035427267 |
| <b>Q5SX40</b> | 0.755085359  | 0.002445036 | 0.035606623 |
| <b>Q2YFS1</b> | -0.124023131 | 0.00245025  | 0.035606623 |
| <b>Q8VHQ4</b> | 0.291348579  | 0.00247915  | 0.035769054 |
| <b>P47877</b> | 0.12776149   | 0.002483177 | 0.035769054 |
| <b>P62301</b> | -0.168850959 | 0.002489084 | 0.035769054 |
| <b>O88983</b> | 0.193830931  | 0.002512807 | 0.035844453 |
| <b>Q8VDH1</b> | -0.116421583 | 0.002505297 | 0.035844453 |
| <b>P97371</b> | 0.139016774  | 0.002602499 | 0.036987893 |
| <b>P24063</b> | 0.153233935  | 0.002623736 | 0.037153629 |
| <b>P62270</b> | -0.19590275  | 0.002635546 | 0.037185154 |
| <b>A2AMZ4</b> | 0.202223813  | 0.002662841 | 0.037434145 |
| <b>Q80X90</b> | 0.125008162  | 0.002686224 | 0.037491182 |
| <b>Q8K1X4</b> | -0.213233064 | 0.002679137 | 0.037491182 |
| <b>Q8VDG3</b> | -0.088018287 | 0.002711911 | 0.037714026 |
| <b>Q920A9</b> | 0.143307523  | 0.002756555 | 0.037813552 |
| <b>Q61103</b> | 0.11580342   | 0.00276962  | 0.037813552 |
| <b>P63166</b> | 0.086170961  | 0.002786175 | 0.037813552 |
| <b>P16460</b> | -0.081335786 | 0.002735885 | 0.037813552 |
| <b>Q99K85</b> | -0.091138807 | 0.002787288 | 0.037813552 |
| <b>P26043</b> | -0.122120738 | 0.002767209 | 0.037813552 |
| <b>Q5F2E8</b> | -0.174855661 | 0.002769497 | 0.037813552 |
| <b>Q05793</b> | 0.327324226  | 0.002874985 | 0.03810869  |
| <b>Q04207</b> | 0.128147065  | 0.002830909 | 0.03810869  |
| <b>Q8BVK9</b> | 0.095400261  | 0.002838929 | 0.03810869  |
| <b>Q9Z0R6</b> | 0.076500066  | 0.002844339 | 0.03810869  |
| <b>Q8BP47</b> | -0.094642333 | 0.002879126 | 0.03810869  |
| <b>Q60596</b> | -0.111003222 | 0.002872072 | 0.03810869  |
| <b>Q60930</b> | -0.158323968 | 0.002887617 | 0.03810869  |
| <b>P51410</b> | -0.240567313 | 0.002855278 | 0.03810869  |
| <b>Q99JY3</b> | 0.121914296  | 0.002922311 | 0.038435824 |
| <b>Q8VI36</b> | 0.103584042  | 0.002945204 | 0.038606052 |
| <b>Q9JLT2</b> | 0.379615259  | 0.00296597  | 0.038726584 |
| <b>Q56A10</b> | -0.163061762 | 0.002974361 | 0.038726584 |
| <b>Q9Z130</b> | 0.183632428  | 0.003026296 | 0.039045547 |
| <b>Q64701</b> | 0.179736258  | 0.003015929 | 0.039045547 |
| <b>Q9DCZ4</b> | 0.129486893  | 0.003032634 | 0.039045547 |
| <b>Q9DAA6</b> | -0.08474758  | 0.003039112 | 0.039045547 |
| <b>Q8VBW6</b> | 0.252426501  | 0.003091407 | 0.039198232 |
| <b>Q9DBP5</b> | 0.128635691  | 0.003082887 | 0.039198232 |

---

---

|        |              |             |             |
|--------|--------------|-------------|-------------|
| P14131 | -0.120118264 | 0.003084652 | 0.039198232 |
| P51881 | -0.263268175 | 0.003079696 | 0.039198232 |
| O54825 | 0.14122169   | 0.003188239 | 0.039733311 |
| Q8BSP2 | 0.109020336  | 0.003173243 | 0.039733311 |
| Q8BGS0 | -0.104960345 | 0.003155584 | 0.039733311 |
| P14148 | -0.11956439  | 0.003152987 | 0.039733311 |
| P62315 | -0.12674316  | 0.00319505  | 0.039733311 |
| A2A9C3 | -0.246844652 | 0.003187406 | 0.039733311 |
| P11911 | 0.093292966  | 0.003215919 | 0.039738969 |
| Q6ZPR6 | -0.097556378 | 0.003223869 | 0.039738969 |
| P15532 | -0.102340994 | 0.003236473 | 0.039738969 |
| Q60597 | -0.113821564 | 0.00323134  | 0.039738969 |
| Q61107 | 0.162644284  | 0.003269756 | 0.039895133 |
| Q9ESU6 | 0.068249774  | 0.003260115 | 0.039895133 |
| Q9CQ54 | -0.235786001 | 0.003284067 | 0.039944143 |
| Q3TVP5 | 0.284042527  | 0.003340978 | 0.040085546 |
| Q9D820 | 0.171430476  | 0.003340217 | 0.040085546 |
| E9Q5K9 | 0.08651647   | 0.003331784 | 0.040085546 |
| A2ARP1 | -0.130565836 | 0.00334735  | 0.040085546 |
| Q9D2R0 | -0.322142335 | 0.003346889 | 0.040085546 |
| Q8BMJ2 | -0.114923398 | 0.003382731 | 0.040384608 |
| Q8C3P7 | 0.202591291  | 0.003466151 | 0.040933976 |
| P06745 | -0.142957743 | 0.003481498 | 0.040933976 |
| Q8K411 | -0.152007415 | 0.003477288 | 0.040933976 |
| Q99LI7 | -0.166200569 | 0.003462105 | 0.040933976 |
| Q5DU05 | -0.174130918 | 0.003443224 | 0.040933976 |
| Q9D620 | -0.301675615 | 0.003517357 | 0.041230653 |
| Q80YR5 | 0.113255276  | 0.00356465  | 0.041409704 |
| B1AX39 | -0.099751987 | 0.003556914 | 0.041409704 |
| O08808 | -0.102850141 | 0.003562654 | 0.041409704 |
| Q6PDI5 | 0.090197248  | 0.003582276 | 0.041490242 |
| Q9CQC6 | -0.08511145  | 0.003660748 | 0.042272925 |
| Q62048 | 0.074373808  | 0.003700948 | 0.042560602 |
| Q9CRD2 | -0.154747057 | 0.003707599 | 0.042560602 |
| Q60952 | -0.096580225 | 0.003720204 | 0.042579324 |
| Q60767 | -0.143259955 | 0.003746664 | 0.042756046 |
| Q9CSN1 | 0.084392691  | 0.003764071 | 0.04282873  |
| Q64692 | 0.617957677  | 0.003829918 | 0.043197911 |
| Q5FWK3 | -0.085401471 | 0.003807732 | 0.043197911 |
| Q8BMC4 | -0.146902199 | 0.003823849 | 0.043197911 |
| Q8BPM0 | -0.420478267 | 0.003856819 | 0.043375238 |
| Q8C804 | -0.127401579 | 0.003869788 | 0.043395314 |
| Q3UZ39 | 0.093112142  | 0.003953222 | 0.044083425 |
| Q5RJG1 | -0.125897443 | 0.003953874 | 0.044083425 |
| Q3TKY6 | 0.073166531  | 0.003982069 | 0.044270566 |
| Q9WUU9 | 0.154456598  | 0.003995345 | 0.044291258 |
| Q6ZQK5 | 0.138048022  | 0.004048569 | 0.044753416 |
| Q9WV80 | -0.083781275 | 0.004078225 | 0.044953166 |
| P62322 | 0.210119639  | 0.004128663 | 0.045252013 |
| P47911 | -0.120156413 | 0.004124441 | 0.045252013 |
| Q9Z266 | 0.137417883  | 0.004156706 | 0.04530343  |
| Q3UFY8 | -0.156191105 | 0.004151811 | 0.04530343  |
| Q8BYZ7 | -0.49809899  | 0.004182029 | 0.045451743 |
| Q9DBT3 | 0.295001235  | 0.00423854  | 0.045634731 |
| Q8BK35 | 0.109014722  | 0.004230539 | 0.045634731 |
| Q9CXJ4 | -0.113354419 | 0.004257673 | 0.045634731 |
| P27659 | -0.129092192 | 0.004248823 | 0.045634731 |
| Q6NS60 | -0.144432267 | 0.004237593 | 0.045634731 |
| Q9D116 | -0.208135628 | 0.004290694 | 0.045861961 |
| Q8K2Z4 | -0.095367939 | 0.004311945 | 0.04596249  |
| Q99J56 | 0.366545645  | 0.004352226 | 0.046041106 |
| P47757 | 0.095829541  | 0.004351485 | 0.046041106 |

---



---

|               |              |             |             |
|---------------|--------------|-------------|-------------|
| <b>Q5SX19</b> | -0.427241233 | 0.004354919 | 0.046041106 |
| <b>O35450</b> | 0.107523789  | 0.004433698 | 0.046746599 |
| <b>Q9QXT0</b> | 0.107575435  | 0.00454515  | 0.047766726 |
| <b>P25976</b> | -0.082203459 | 0.004555074 | 0.047766726 |
| <b>E9Q634</b> | -0.11220241  | 0.004584825 | 0.047949118 |
| <b>P84244</b> | -0.107463493 | 0.004657663 | 0.04857993  |
| <b>Q3THG9</b> | 0.157877329  | 0.004751691 | 0.049355371 |
| <b>P97855</b> | -0.082802883 | 0.004757451 | 0.049355371 |
| <b>P62627</b> | 0.144792382  | 0.004818812 | 0.04985864  |
| <b>Q8BH51</b> | -0.139013344 | 0.004839796 | 0.049942575 |
| <b>O55087</b> | 0.155559241  | 0.00488926  | 0.050186059 |
| <b>Q3UHJ0</b> | 0.115259809  | 0.00488354  | 0.050186059 |
| <b>P97823</b> | -0.108013759 | 0.00490321  | 0.050196448 |
| <b>Q69ZK0</b> | -0.150997978 | 0.004932313 | 0.05036151  |
| <b>Q8R001</b> | -0.110492966 | 0.004976734 | 0.050681702 |
| <b>Q7TMQ7</b> | -0.400127751 | 0.005000119 | 0.050786554 |
| <b>Q9DC70</b> | -0.104621322 | 0.005026904 | 0.050925297 |
| <b>P14069</b> | 0.464493223  | 0.005109283 | 0.051224853 |
| <b>Q501J6</b> | 0.215846577  | 0.005087908 | 0.051224853 |
| <b>Q91VY9</b> | 0.096750378  | 0.005100318 | 0.051224853 |
| <b>Q8BZN6</b> | -0.170420934 | 0.005090726 | 0.051224853 |
| <b>O70494</b> | 0.202932709  | 0.005190385 | 0.051903855 |
| <b>Q9D1G1</b> | -0.078906006 | 0.005227505 | 0.052140665 |
| <b>Q921E6</b> | 0.164166609  | 0.005254275 | 0.0522733   |
| <b>Q9JIX8</b> | 0.160251392  | 0.005275755 | 0.052352761 |
| <b>Q80VC9</b> | 0.14677921   | 0.005298641 | 0.052445737 |
| <b>O35188</b> | 0.450570065  | 0.005344761 | 0.052500438 |
| <b>O54931</b> | 0.126080426  | 0.005341407 | 0.052500438 |
| <b>P62754</b> | -0.110730288 | 0.005339017 | 0.052500438 |
| <b>P62855</b> | -0.155333744 | 0.005416187 | 0.053067691 |
| <b>Q9JJN0</b> | 0.220739794  | 0.005489999 | 0.053655401 |
| <b>Q61074</b> | 0.081395305  | 0.005526969 | 0.053745965 |
| <b>Q9Z103</b> | 0.069346723  | 0.00551784  | 0.053745965 |
| <b>Q99PU8</b> | -0.132979409 | 0.005548509 | 0.053820538 |
| <b>P16330</b> | -0.082880792 | 0.00558097  | 0.053866083 |
| <b>Q3UJU9</b> | -0.12305781  | 0.005575115 | 0.053866083 |
| <b>P61222</b> | -0.088436969 | 0.00561272  | 0.053948351 |
| <b>Q8C3X2</b> | -0.114035073 | 0.005631207 | 0.053948351 |
| <b>O08550</b> | -0.179343813 | 0.005624616 | 0.053948351 |
| <b>P60762</b> | 0.134991115  | 0.005648741 | 0.053983038 |
| <b>Q61768</b> | 0.082477744  | 0.005698675 | 0.054326439 |
| <b>P00493</b> | -0.1112715   | 0.005730142 | 0.054359295 |
| <b>Q8C133</b> | -0.284186667 | 0.005720832 | 0.054359295 |
| <b>Q91WG8</b> | 0.147257034  | 0.005821421 | 0.054614568 |
| <b>P09450</b> | 0.111088047  | 0.005776987 | 0.054614568 |
| <b>Q9D6J6</b> | 0.108514946  | 0.005794966 | 0.054614568 |
| <b>Q9JHS9</b> | 0.086137993  | 0.00580551  | 0.054614568 |
| <b>P50136</b> | -0.133450095 | 0.005827431 | 0.054614568 |
| <b>Q9WU20</b> | 0.301295779  | 0.005873871 | 0.054861171 |
| <b>Q9R1Q7</b> | -0.223834288 | 0.005882022 | 0.054861171 |
| <b>P62717</b> | -0.098108506 | 0.00594109  | 0.055279206 |
| <b>Q9Z2D6</b> | 0.233124675  | 0.005973708 | 0.055317391 |
| <b>P83887</b> | -0.142855405 | 0.005969057 | 0.055317391 |
| <b>Q8C2K5</b> | 0.066568104  | 0.006007289 | 0.055495911 |
| <b>Q6P5B0</b> | -0.076461452 | 0.006041839 | 0.055682504 |
| <b>Q922D8</b> | -0.080848101 | 0.006063285 | 0.055747742 |
| <b>P23249</b> | 0.299622233  | 0.006104106 | 0.05592182  |
| <b>Q62383</b> | 0.098148892  | 0.006150481 | 0.05592182  |
| <b>P62305</b> | -0.124350003 | 0.006115619 | 0.05592182  |
| <b>P41230</b> | -0.131744741 | 0.006154283 | 0.05592182  |
| <b>O08810</b> | -0.234911842 | 0.006128655 | 0.05592182  |
| <b>Q8K2A7</b> | 0.095228894  | 0.006181158 | 0.056034799 |

---

---

|        |              |             |             |
|--------|--------------|-------------|-------------|
| Q9D162 | -0.188246928 | 0.006219915 | 0.056254708 |
| E9PVA8 | -0.108343365 | 0.006237455 | 0.056282155 |
| O88543 | 0.102933997  | 0.006322358 | 0.056652999 |
| Q99L27 | 0.083080182  | 0.006306666 | 0.056652999 |
| Q8BWY3 | -0.16606388  | 0.0063208   | 0.056652999 |
| Q9JKY0 | -0.11261582  | 0.006376403 | 0.057005631 |
| P70404 | 0.127048347  | 0.006458381 | 0.05714029  |
| Q61233 | 0.092057443  | 0.006479827 | 0.05714029  |
| P54279 | -0.11786606  | 0.006461499 | 0.05714029  |
| P62245 | -0.139479515 | 0.006440964 | 0.05714029  |
| P56135 | -0.196677658 | 0.006462368 | 0.05714029  |
| Q03141 | -0.277272171 | 0.006476742 | 0.05714029  |
| E9Q784 | 0.07118818   | 0.006519178 | 0.057356942 |
| Q6NZL6 | 0.246217531  | 0.006542303 | 0.057365176 |
| O35129 | -0.240889366 | 0.006549684 | 0.057365176 |
| Q57114 | 0.192749053  | 0.006609587 | 0.057500446 |
| P14824 | 0.141907777  | 0.006608647 | 0.057500446 |
| P06151 | -0.138548596 | 0.006586481 | 0.057500446 |
| Q9JMD0 | 0.374579086  | 0.006671737 | 0.05775634  |
| Q8VDL4 | 0.21238467   | 0.006683659 | 0.05775634  |
| Q6P6M7 | -0.083632205 | 0.006656588 | 0.05775634  |
| Q9CZ57 | -0.084353779 | 0.006706636 | 0.057826105 |
| Q80XJ2 | 0.324700655  | 0.006823113 | 0.05831207  |
| Q9JIK9 | 0.229825624  | 0.006801651 | 0.05831207  |
| Q61097 | 0.181947133  | 0.006817249 | 0.05831207  |
| Q9CWN7 | -0.090257265 | 0.006817879 | 0.05831207  |
| Q6ZVV7 | -0.14192559  | 0.006922298 | 0.059029703 |
| Q80VH0 | 0.068647216  | 0.006972071 | 0.059193949 |
| Q8K039 | 0.068500339  | 0.006960902 | 0.059193949 |
| Q8BMS1 | -0.099656641 | 0.007044618 | 0.059679301 |
| Q9CQE5 | 0.12608847   | 0.007108903 | 0.059861457 |
| Q6ZVV3 | -0.131906538 | 0.007112405 | 0.059861457 |
| Q9D032 | -0.190241531 | 0.007101453 | 0.059861457 |
| Q9CXW4 | -0.10441558  | 0.007171332 | 0.06009669  |
| Q3U3E2 | -0.119646249 | 0.007161355 | 0.06009669  |
| Q61686 | 0.094315447  | 0.007188486 | 0.060110613 |
| Q6RUT7 | 0.320749936  | 0.007292555 | 0.060269274 |
| A2AWL7 | 0.307355606  | 0.007261642 | 0.060269274 |
| Q9CX60 | 0.099320062  | 0.007275745 | 0.060269274 |
| Q9Z0W3 | -0.092141159 | 0.007300626 | 0.060269274 |
| Q8K1R7 | -0.102817689 | 0.00730066  | 0.060269274 |
| Q9CWX9 | -0.130051272 | 0.007223455 | 0.060269274 |
| Q61048 | 0.178000503  | 0.007411686 | 0.061055929 |
| Q80UG2 | 0.141186328  | 0.007474242 | 0.061144147 |
| Q8R4H2 | 0.129240683  | 0.007484721 | 0.061144147 |
| P70168 | -0.080170059 | 0.00748543  | 0.061144147 |
| Q8C0G2 | -0.084940757 | 0.007453355 | 0.061144147 |
| P35831 | -0.092137376 | 0.007517005 | 0.061273064 |
| Q8R3H9 | 0.208247646  | 0.007595261 | 0.061395029 |
| Q8K301 | -0.113299356 | 0.00758958  | 0.061395029 |
| Q9DB20 | -0.124654591 | 0.00757429  | 0.061395029 |
| A6PWD2 | -0.350168821 | 0.007568383 | 0.061395029 |
| Q3V1H1 | 0.111903155  | 0.007629185 | 0.061541033 |
| Q8BW96 | -0.119052558 | 0.007646937 | 0.06155626  |
| Q3UJD6 | 0.06724252   | 0.00766349  | 0.061561782 |
| Q80U63 | 0.166212285  | 0.007727069 | 0.06194309  |
| D3YWJ0 | 0.135718708  | 0.007748215 | 0.06194309  |
| Q80Y56 | 0.129794923  | 0.007787661 | 0.06194309  |
| Q9D880 | -0.103840111 | 0.007768887 | 0.06194309  |
| Q8C3I8 | -0.165782644 | 0.00779078  | 0.06194309  |
| Q91XB0 | -0.144692054 | 0.007808903 | 0.06196021  |
| Q9Z0H7 | 0.164809871  | 0.007849826 | 0.06215781  |

---

---

|        |              |             |             |
|--------|--------------|-------------|-------------|
| Q8BHN5 | 0.463684568  | 0.007939936 | 0.062569599 |
| Q91VD9 | -0.079670746 | 0.007932353 | 0.062569599 |
| Q8V184 | -0.215401914 | 0.007950209 | 0.062569599 |
| Q5XG73 | -0.092035421 | 0.008017844 | 0.062974159 |
| Q9CZN7 | -0.10192259  | 0.008092847 | 0.063434843 |
| Q8CFE4 | 0.357292459  | 0.008190897 | 0.063723327 |
| Q80SW1 | 0.125903166  | 0.008265951 | 0.063723327 |
| Q9CXP8 | 0.1083982    | 0.008281042 | 0.063723327 |
| Q8C7R4 | 0.076210814  | 0.008222611 | 0.063723327 |
| Q76MZ3 | -0.084842752 | 0.008288893 | 0.063723327 |
| Q9WTM5 | -0.086379954 | 0.008263333 | 0.063723327 |
| Q9D1R2 | -0.129750442 | 0.008208306 | 0.063723327 |
| P39447 | -0.142075764 | 0.008293887 | 0.063723327 |
| Q6PHZ2 | -0.152143114 | 0.008250547 | 0.063723327 |
| P28665 | -0.279321115 | 0.008234605 | 0.063723327 |
| Q922S8 | -0.089464353 | 0.008488524 | 0.065089867 |
| P62843 | -0.189972989 | 0.008515544 | 0.065168267 |
| Q7TQH0 | 0.0570638    | 0.008566109 | 0.065245276 |
| Q9D924 | -0.124314213 | 0.008576054 | 0.065245276 |
| Q6NXW6 | -0.293938488 | 0.008544809 | 0.065245276 |
| A0AUP1 | 0.115657499  | 0.008654521 | 0.065623156 |
| P60840 | 0.085351856  | 0.00865955  | 0.065623156 |
| P84228 | -0.12254804  | 0.008685726 | 0.065693207 |
| Q8BNV1 | 0.084958557  | 0.008830228 | 0.066656196 |
| Q91YE5 | -0.076565216 | 0.0088476   | 0.066657644 |
| P14869 | -0.153038745 | 0.008892959 | 0.066869533 |
| Q3UJV1 | 0.168327705  | 0.008968936 | 0.067180447 |
| Q8K199 | 0.10961502   | 0.008956541 | 0.067180447 |
| Q91YR1 | -0.119269653 | 0.009174637 | 0.068588806 |
| Q9QYI4 | -0.258598346 | 0.009207132 | 0.068699367 |
| Q9DCR2 | -0.108022517 | 0.009248015 | 0.068871975 |
| O88448 | 0.086999207  | 0.009310816 | 0.069206832 |
| P97372 | 0.120701404  | 0.00949693  | 0.070186835 |
| Q91X11 | -0.10301689  | 0.009479224 | 0.070186835 |
| P97432 | -0.107534639 | 0.009482921 | 0.070186835 |
| O08795 | 0.141945678  | 0.009553165 | 0.070257553 |
| P15806 | 0.094593581  | 0.009578929 | 0.070257553 |
| P67778 | -0.130829127 | 0.00957078  | 0.070257553 |
| O88593 | -0.136604164 | 0.009570803 | 0.070257553 |
| P97496 | -0.083930685 | 0.009603428 | 0.070304344 |
| Q501J7 | 0.120262064  | 0.009643049 | 0.070461453 |
| Q9D0C1 | 0.243612461  | 0.009743392 | 0.070794683 |
| Q9Z1K7 | 0.23761481   | 0.009737408 | 0.070794683 |
| Q6PCP5 | 0.150192994  | 0.009714964 | 0.070794683 |
| Q80ZS3 | -0.102690496 | 0.009770233 | 0.070857014 |
| Q8BHX1 | -0.062492092 | 0.009842094 | 0.071245006 |
| Q61179 | 0.158577921  | 0.009889616 | 0.071285704 |
| Q02526 | 0.131364994  | 0.009866416 | 0.071285704 |
| Q8VE47 | 0.077636678  | 0.009920658 | 0.071285704 |
| Q60931 | -0.221507    | 0.009921206 | 0.071285704 |
| Q8C569 | -0.106125447 | 0.009975797 | 0.071545457 |
| Q8CG72 | 0.154943698  | 0.010012435 | 0.071675734 |
| Q8BP78 | 0.085921986  | 0.010072566 | 0.071973401 |
| Q8CG47 | -0.078226634 | 0.010110528 | 0.072111852 |
| Q91ZW3 | -0.079199644 | 0.01016805  | 0.072389052 |
| Q8BX17 | -0.098672599 | 0.010227804 | 0.072681098 |
| Q5EBH1 | 1.350219834  | 0.010305888 | 0.072820066 |
| Q8K3A0 | 0.252207725  | 0.010322432 | 0.072820066 |
| Q60960 | 0.069038372  | 0.010306085 | 0.072820066 |
| Q8BYM8 | -1.050711142 | 0.010306669 | 0.072820066 |
| Q9CQ21 | 0.232235394  | 0.010475623 | 0.073766641 |
| P62996 | 0.066383589  | 0.010508839 | 0.073866478 |

---

---

|        |              |             |             |
|--------|--------------|-------------|-------------|
| Q8K1A5 | 0.122697858  | 0.010589415 | 0.074298248 |
| Q93092 | 0.097430509  | 0.010680498 | 0.07480204  |
| Q9JM14 | 0.113335205  | 0.010724765 | 0.074976735 |
| Q99LG4 | 0.311768408  | 0.010788125 | 0.075014202 |
| Q9UNN5 | -0.098130629 | 0.010762896 | 0.075014202 |
| Q9WU42 | -0.101067928 | 0.010775675 | 0.075014202 |
| O89079 | 0.130221977  | 0.010895134 | 0.075487714 |
| Q64127 | 0.084631055  | 0.01088531  | 0.075487714 |
| Q61207 | 0.213637775  | 0.010941592 | 0.075524233 |
| O88879 | 0.123604521  | 0.011020733 | 0.075524233 |
| Q6PDM2 | 0.107933792  | 0.010974494 | 0.075524233 |
| Q8VDP4 | 0.092147054  | 0.010934619 | 0.075524233 |
| C0HKD9 | 0.091203408  | 0.01103666  | 0.075524233 |
| P35991 | -0.151461767 | 0.01098388  | 0.075524233 |
| Q60932 | -0.207505458 | 0.011020967 | 0.075524233 |
| O70370 | 0.189609707  | 0.011166408 | 0.075671067 |
| Q9CVI2 | 0.160501786  | 0.01113459  | 0.075671067 |
| Q9Z2Y8 | 0.154809735  | 0.011236476 | 0.075671067 |
| Q4FK66 | 0.129987362  | 0.011240779 | 0.075671067 |
| Q8K296 | 0.070646666  | 0.011187985 | 0.075671067 |
| Q9D168 | -0.065681289 | 0.011267965 | 0.075671067 |
| P50431 | -0.072736962 | 0.011272649 | 0.075671067 |
| Q8QZV7 | -0.073440399 | 0.011086391 | 0.075671067 |
| Q6NZC7 | -0.089007621 | 0.011261696 | 0.075671067 |
| O35972 | -0.112688466 | 0.011159815 | 0.075671067 |
| Q9D0M3 | -0.147436428 | 0.011147122 | 0.075671067 |
| Q3UFY0 | -0.322362628 | 0.011300688 | 0.075728275 |
| Q8VC30 | -0.059736701 | 0.011321223 | 0.075735075 |
| Q9ERA6 | 0.138119562  | 0.011347236 | 0.075777369 |
| Q9WTL7 | 0.121142807  | 0.011366605 | 0.075777369 |
| Q8QZY9 | 0.152884476  | 0.011462315 | 0.075894626 |
| Q9CS00 | -0.07971963  | 0.011426738 | 0.075894626 |
| Q80U62 | -0.137154639 | 0.011440341 | 0.075894626 |
| Q8R003 | -0.145156402 | 0.011462436 | 0.075894626 |
| Q60875 | 0.087979751  | 0.011502932 | 0.076033008 |
| Q9D0G0 | -0.074700341 | 0.011526358 | 0.076058279 |
| Q61584 | 0.078483101  | 0.011590399 | 0.07614289  |
| B2RY56 | 0.05906221   | 0.011617678 | 0.07614289  |
| Q6NXH3 | -0.086943326 | 0.011600045 | 0.07614289  |
| Q91YT2 | -0.18903557  | 0.011576628 | 0.07614289  |
| Q8CAK3 | 0.078289069  | 0.011807098 | 0.076994183 |
| P62715 | 0.059965412  | 0.011780843 | 0.076994183 |
| A2RSQ0 | -0.208807844 | 0.011803667 | 0.076994183 |
| Q80WS3 | 0.657868236  | 0.011881105 | 0.077088108 |
| Q9R053 | 0.245681594  | 0.011866682 | 0.077088108 |
| Q8R1T1 | 0.142405701  | 0.01185137  | 0.077088108 |
| P70193 | 0.176250824  | 0.011983835 | 0.077565351 |
| Q91WG2 | 0.116070532  | 0.012054615 | 0.077565351 |
| P24547 | -0.07559976  | 0.012042973 | 0.077565351 |
| Q8CCJ3 | -0.115691055 | 0.012034242 | 0.077565351 |
| P62702 | -0.131627712 | 0.01203356  | 0.077565351 |
| Q8BGU5 | 0.134419412  | 0.012173795 | 0.078202525 |
| Q7TPM1 | -0.149937015 | 0.012207881 | 0.078291868 |
| Q6PFH3 | -0.175216868 | 0.012250658 | 0.078436558 |
| Q8C5S3 | 0.243454606  | 0.012368439 | 0.078764729 |
| P42227 | 0.086274143  | 0.012322651 | 0.078764729 |
| Q9CXE7 | -0.083481884 | 0.012354665 | 0.078764729 |
| P43275 | -0.127436273 | 0.012383115 | 0.078764729 |
| Q80UV9 | -0.33894257  | 0.012451216 | 0.079068279 |
| Q9D1M4 | -0.073611086 | 0.012536645 | 0.07948069  |
| Q922Q2 | -0.080750186 | 0.012580178 | 0.079496892 |
| P97461 | -0.139870094 | 0.012568287 | 0.079496892 |

---

---

|        |              |             |             |
|--------|--------------|-------------|-------------|
| B1AY13 | -0.143485032 | 0.012660383 | 0.079873634 |
| P62962 | 0.101026261  | 0.012721897 | 0.080094189 |
| O70551 | -0.077830259 | 0.012736627 | 0.080094189 |
| Q922L6 | -0.089711813 | 0.012792543 | 0.080315644 |
| Q5SVQ0 | -0.08169248  | 0.012874826 | 0.080701654 |
| Q9D2V5 | 0.080663704  | 0.012924787 | 0.080753903 |
| Q9Z2D8 | -0.082944498 | 0.012905466 | 0.080753903 |
| Q80TZ9 | 0.067495822  | 0.013045469 | 0.081376878 |
| Q9DBG3 | -0.083037184 | 0.013111957 | 0.081660344 |
| Q80Z25 | -0.088648218 | 0.013177174 | 0.081934992 |
| B1AR13 | 0.222049106  | 0.013267769 | 0.082366312 |
| Q9D6T0 | -0.084968071 | 0.013364571 | 0.082834719 |
| O54926 | 0.13632425   | 0.013568136 | 0.083828613 |
| P48722 | -0.20497791  | 0.013561215 | 0.083828613 |
| Q3UQU0 | -0.098353909 | 0.013696041 | 0.084484323 |
| Q9D4H8 | -0.132053902 | 0.013722376 | 0.084512413 |
| Q9DBX2 | 0.110845084  | 0.01381508  | 0.084861177 |
| Q8BSZ2 | -0.356682849 | 0.013822748 | 0.084861177 |
| Q8K1H7 | -0.134986108 | 0.013903317 | 0.085220964 |
| P46460 | -0.067530114 | 0.013942992 | 0.085275455 |
| Q8BJS4 | -0.070299393 | 0.013956163 | 0.085275455 |
| Q9QZ88 | -0.09122034  | 0.013980965 | 0.085292682 |
| Q6PB66 | -0.109128354 | 0.014062815 | 0.085575555 |
| Q8BG79 | -0.191036123 | 0.014071444 | 0.085575555 |
| Q7TMY8 | -0.06674065  | 0.014176942 | 0.086082212 |
| P43247 | -0.060154472 | 0.014230341 | 0.086271441 |
| Q9CYA0 | 0.125771057  | 0.014272699 | 0.08639325  |
| Q5RJH6 | -0.274132137 | 0.01433307  | 0.08662354  |
| Q91W10 | 0.310672515  | 0.01441644  | 0.086692462 |
| Q63810 | 0.210599896  | 0.014483284 | 0.086692462 |
| Q9D9R9 | 0.095390538  | 0.014500878 | 0.086692462 |
| Q8BGF3 | -0.082738836 | 0.014449138 | 0.086692462 |
| Q8VCE4 | -0.090655992 | 0.014391315 | 0.086692462 |
| Q9ESC8 | -0.094472727 | 0.014465027 | 0.086692462 |
| Q7TPD1 | -0.139065374 | 0.014399423 | 0.086692462 |
| A6H611 | 0.104051149  | 0.014529756 | 0.086703629 |
| A2AWA9 | 0.102762121  | 0.01462618  | 0.086703629 |
| O88700 | 0.08560252   | 0.014617553 | 0.086703629 |
| Q8BTW9 | -0.086493914 | 0.014568827 | 0.086703629 |
| Q9CZX0 | -0.152430928 | 0.014636824 | 0.086703629 |
| Q9DAS9 | -0.154836593 | 0.014571344 | 0.086703629 |
| Q9JL61 | 0.135769673  | 0.014709732 | 0.086870262 |
| Q8VDM4 | -0.077697707 | 0.014704457 | 0.086870262 |
| Q6ZQ38 | -0.125236094 | 0.014769864 | 0.087092817 |
| Q8BX90 | 0.285569554  | 0.014858884 | 0.087484782 |
| Q9CPY7 | -0.067190758 | 0.014955068 | 0.08791767  |
| P62192 | -0.137987191 | 0.015012638 | 0.088122597 |
| Q9D0I9 | -0.083500002 | 0.015077533 | 0.088369831 |
| P58158 | 0.149546704  | 0.015260952 | 0.088508958 |
| P22907 | 0.149209362  | 0.015250122 | 0.088508958 |
| Q8C0L0 | 0.137094656  | 0.015186201 | 0.088508958 |
| Q91V12 | 0.105622333  | 0.015255155 | 0.088508958 |
| Q8VCW8 | 0.094606668  | 0.015213404 | 0.088508958 |
| Q9D8Y0 | -0.071323529 | 0.015195187 | 0.088508958 |
| Q8BU30 | -0.161267245 | 0.015231127 | 0.088508958 |
| O54988 | -0.093498649 | 0.015468304 | 0.089577642 |
| Q91VY6 | 0.229226752  | 0.015513723 | 0.089706771 |
| Q9DCD2 | -0.117455253 | 0.015821769 | 0.09135188  |
| Q9D9K3 | -0.27276537  | 0.015846886 | 0.091360945 |
| Q8CIS0 | 0.074109352  | 0.015903483 | 0.091551207 |
| Q9D9Z5 | 0.165112227  | 0.015938273 | 0.091615556 |
| Q9CQI7 | -0.071410157 | 0.016029375 | 0.091867022 |

---

---

|               |              |             |             |
|---------------|--------------|-------------|-------------|
| <b>Q91VK1</b> | -0.152375051 | 0.01602667  | 0.091867022 |
| <b>Q9CPW2</b> | -0.103871476 | 0.016183367 | 0.092612779 |
| <b>Q80UU9</b> | 0.107511184  | 0.0163269   | 0.092761494 |
| <b>Q71M36</b> | 0.107188576  | 0.016273831 | 0.092761494 |
| <b>Q91YU8</b> | 0.07477137   | 0.016352799 | 0.092761494 |
| <b>P55200</b> | 0.060628204  | 0.016336013 | 0.092761494 |
| <b>P98083</b> | -0.056939693 | 0.016316842 | 0.092761494 |
| <b>Q9CPR4</b> | -0.12959256  | 0.016241555 | 0.092761494 |
| <b>Q9QXK2</b> | 0.075371269  | 0.016387313 | 0.092821568 |
| <b>Q8CDD9</b> | 0.176076683  | 0.016451084 | 0.093046948 |
| <b>Q61216</b> | 0.052124393  | 0.016592294 | 0.093709028 |
| <b>Q9QYR9</b> | 0.116007203  | 0.016651081 | 0.093768059 |
| <b>Q9CZB3</b> | -1.191781915 | 0.01664472  | 0.093768059 |
| <b>P63276</b> | -0.107968077 | 0.016688084 | 0.093840243 |
| <b>P68254</b> | 0.129371087  | 0.016724341 | 0.093908024 |
| <b>Q9WTQ5</b> | 0.171699199  | 0.016805833 | 0.094229235 |
| <b>Q80U93</b> | -0.068814855 | 0.016840013 | 0.094284634 |
| <b>Q0VEE6</b> | -0.083081128 | 0.017042038 | 0.095278254 |
| <b>P01901</b> | 0.177469049  | 0.017238253 | 0.096088615 |
| <b>P62889</b> | -0.085139516 | 0.017261279 | 0.096088615 |
| <b>Q1HFZ0</b> | -0.089362674 | 0.017258606 | 0.096088615 |
| <b>Q9WUD8</b> | 0.282488665  | 0.017321896 | 0.096259361 |
| <b>Q0VGT4</b> | -0.261187588 | 0.01734157  | 0.096259361 |
| <b>O55098</b> | 0.090270314  | 0.017517956 | 0.097099529 |
| <b>P83741</b> | -0.101395136 | 0.017574183 | 0.097272228 |
| <b>Q9CQH3</b> | -0.153971401 | 0.017796179 | 0.098360648 |
| <b>Q8CAY6</b> | -0.098745143 | 0.017824141 | 0.098375058 |
| <b>Q8CI75</b> | 0.083971105  | 0.017911437 | 0.098592284 |
| <b>Q9Z140</b> | -0.362376991 | 0.01791432  | 0.098592284 |
| <b>Q6P4S8</b> | 0.11934236   | 0.018064782 | 0.098859453 |
| <b>Q61142</b> | 0.072591719  | 0.018048874 | 0.098859453 |
| <b>Q9ERD6</b> | -0.075062808 | 0.018030394 | 0.098859453 |
| <b>Q9R0Q1</b> | -0.406327537 | 0.018026629 | 0.098859453 |
| <b>P58501</b> | -0.101009474 | 0.018178983 | 0.099344301 |

---

**Supplemental Table 4. Summary of *VDJ* recombination and somatic hypermutation analysis in *KO* mice with indicated lymphoma phenotypes**

| <b>Diagnosis</b> | <b>Mouse No</b> | <b>VH</b>                        | <b>DH</b>    | <b>JH</b>  | <b>VH mut.</b> |
|------------------|-----------------|----------------------------------|--------------|------------|----------------|
| <b>FL</b>        | FL_1            | IGHV5-17*01 F                    | IGHD1-1*01 F | IGHJ1*03 F | 1              |
|                  | FL_2            | IGHV1-76*01 F                    | IGHD2-4*01 F | IGHJ4*01 F | 13             |
|                  | FL_3            | IGHV2-9-1*01 F                   | IGHD3-1*01 F | IGHJ4*01 F | 2              |
| <b>DLBCL</b>     | DLBCL_1         | IGHV5-6*02 [F] or IGHV5-6*03 [F] | IGHD4-1*01 F | IGHJ1*03 F | 4              |
|                  | DLBCL_2         | IGHV1-47*01 F                    | IGHD3-2*01 F | IGHJ2*01 F | 31             |
|                  | DLBCL_3         | IGHV9-3*01 F                     | IGHD4-1*01 F | IGHJ4*01 F | 1              |
| <b>EP</b>        | PC_1            | IGHV2-2*01 F                     | IGHD2-4*01 F | IGHJ4*01 F | 7              |
|                  | PC_2            | IGHV9-3*01 F                     | IGHD4-1*01 F | IGHJ4*01 F | 2 or 0*        |
|                  | PC_3            | IGHV12-3*01 F                    | IGHD2-3*01 F | IGHJ4*01 F | 6              |

\*6 of 9 screened colonies harboring immunoglobulin region had mutations, 3 didn't

**Supplemental Table 5. Summary of somatic mutations in GC B-cells from 12-week old *KO* mice and spleens from *KO* mice that did not develop neoplasms**

| <b>Gene</b>            | <b>Sample</b>           | <b>Protein changes of variants that passed MuTect2 Filters (VAF)</b> |
|------------------------|-------------------------|----------------------------------------------------------------------|
| <b><i>Gna13</i></b>    | <i>KO</i> GC B-cells #1 | -                                                                    |
|                        | <i>KO</i> GC B-cells #2 | -                                                                    |
|                        | <i>KO</i> GC B-cells #3 | p.R69W (0.37%), p.G111Efs*12 (0.51%), p.M136V (0.44%)                |
|                        | <i>KO</i> spleen #1     | -                                                                    |
|                        | <i>KO</i> spleen #2     | -                                                                    |
|                        | <i>KO</i> spleen #3     | p.T352Rfs*17 (1.07%)                                                 |
| <b><i>Hist1h1c</i></b> | <i>KO</i> GC B-cells #1 | -                                                                    |
|                        | <i>KO</i> GC B-cells #2 | -                                                                    |
|                        | <i>KO</i> GC B-cells #3 | -                                                                    |
|                        | <i>KO</i> spleen #1     | -                                                                    |
|                        | <i>KO</i> spleen #2     | -                                                                    |
|                        | <i>KO</i> spleen #3     | -                                                                    |
| <b><i>Hist1h1e</i></b> | <i>KO</i> GC B-cells #1 | -                                                                    |
|                        | <i>KO</i> GC B-cells #2 | -                                                                    |
|                        | <i>KO</i> GC B-cells #3 | -                                                                    |
|                        | <i>KO</i> spleen #1     | -                                                                    |
|                        | <i>KO</i> spleen #2     | -                                                                    |
|                        | <i>KO</i> spleen #3     | -                                                                    |
| <b><i>Pim1</i></b>     | <i>KO</i> GC B-cells #1 | -                                                                    |
|                        | <i>KO</i> GC B-cells #2 | -                                                                    |
|                        | <i>KO</i> GC B-cells #3 | -                                                                    |
|                        | <i>KO</i> spleen #1     | p.S54P (1.62%)                                                       |
|                        | <i>KO</i> spleen #2     | p.A224T (0.94%)                                                      |
|                        | <i>KO</i> spleen #3     | p.K94R (0.71%), p.I248T (1.2%)                                       |



# Supplemental Figures

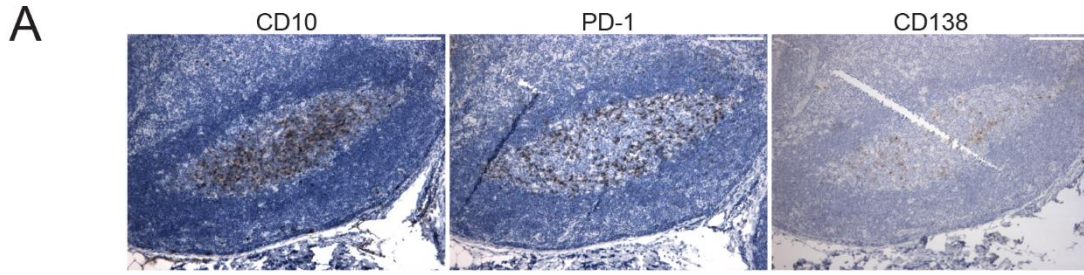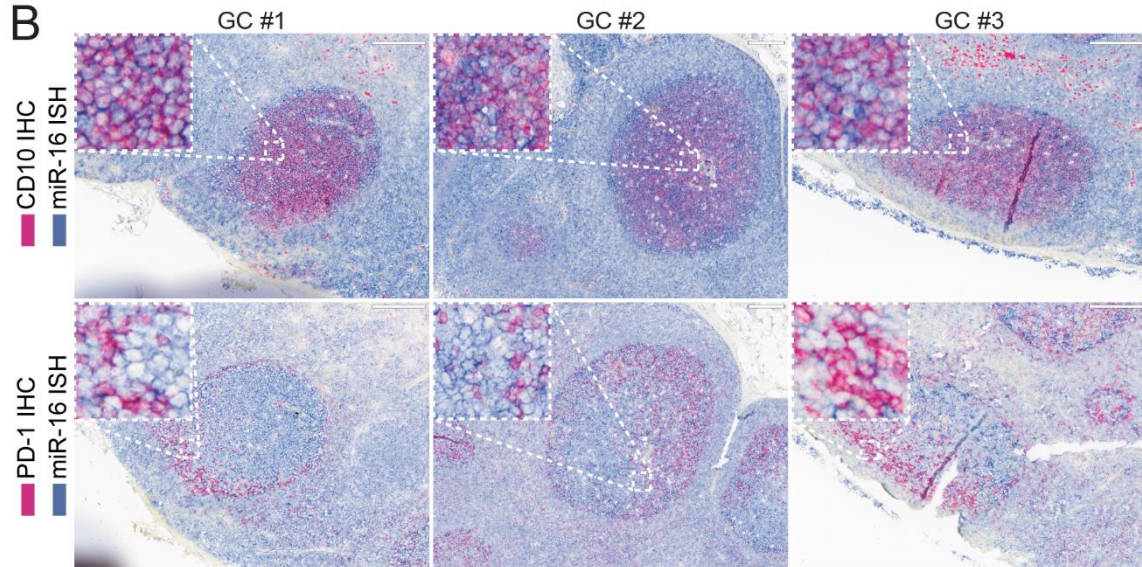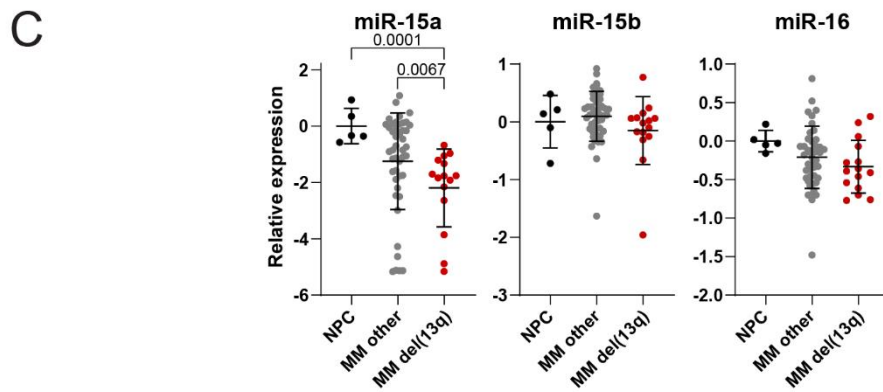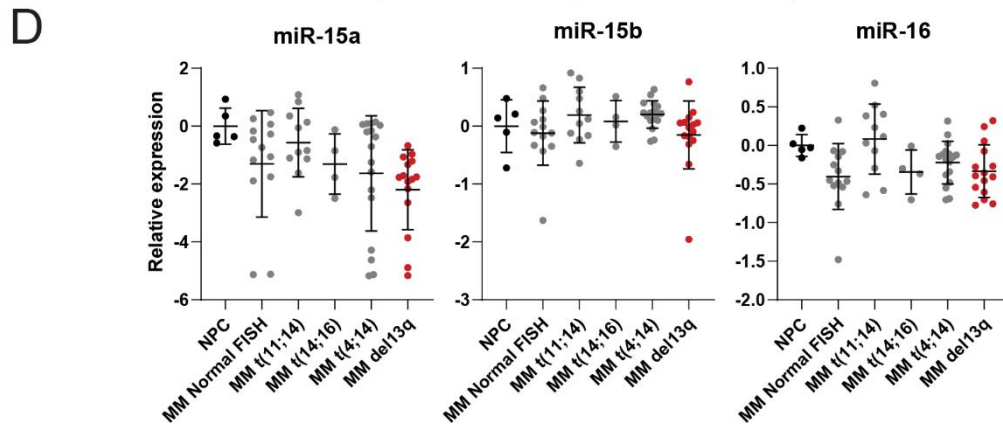

**Supplemental Figure 1. miR-15a and miR-16 expression in human GCs and MM cells**

**(A)** IHC analysis of CD10, PD-1, and CD138 expression in LNs from a normal subject. Note that most cells within the GC are CD10<sup>+</sup> GC B-cells varyingly infiltrated by PD-1<sup>+</sup> T<sub>FH</sub>-cells and CD138<sup>+</sup> PCs. H&E, hematoxylin and eosin. Scale bar = 200µm.

**(B)** miR-16 co-localization with GC B-cell marker CD10 and T<sub>FH</sub>-cell marker PD-1 in human LNs. miR-16 expression was assessed by ISH (dark purple), followed by IHC analysis for CD10 or PD-1 (red) on the same FFPE slide. Three representative examples are shown. Note co-localization of miR-16 signal and CD10 in GC B-cells as well as PD-1 in T<sub>FH</sub>-cells. Scale bar = 200µm.

**(C)** miR-15a, miR-15b, and miR-16 levels in BM CD138<sup>+</sup> cells from healthy donors (normal plasma cells; NPC) and MM patients without (other) or with del(13q) from GSE16558. Graphs depict the mean ±SD. *P* values were calculated using Mann–Whitney *U*-test.

**(D)** miR-15a, miR-15b, and miR-16 levels in BM CD138<sup>+</sup> cells from healthy donors (normal plasma cells; NPC) and MM patients with indicated alteration. Graphs depict the mean ±SD.

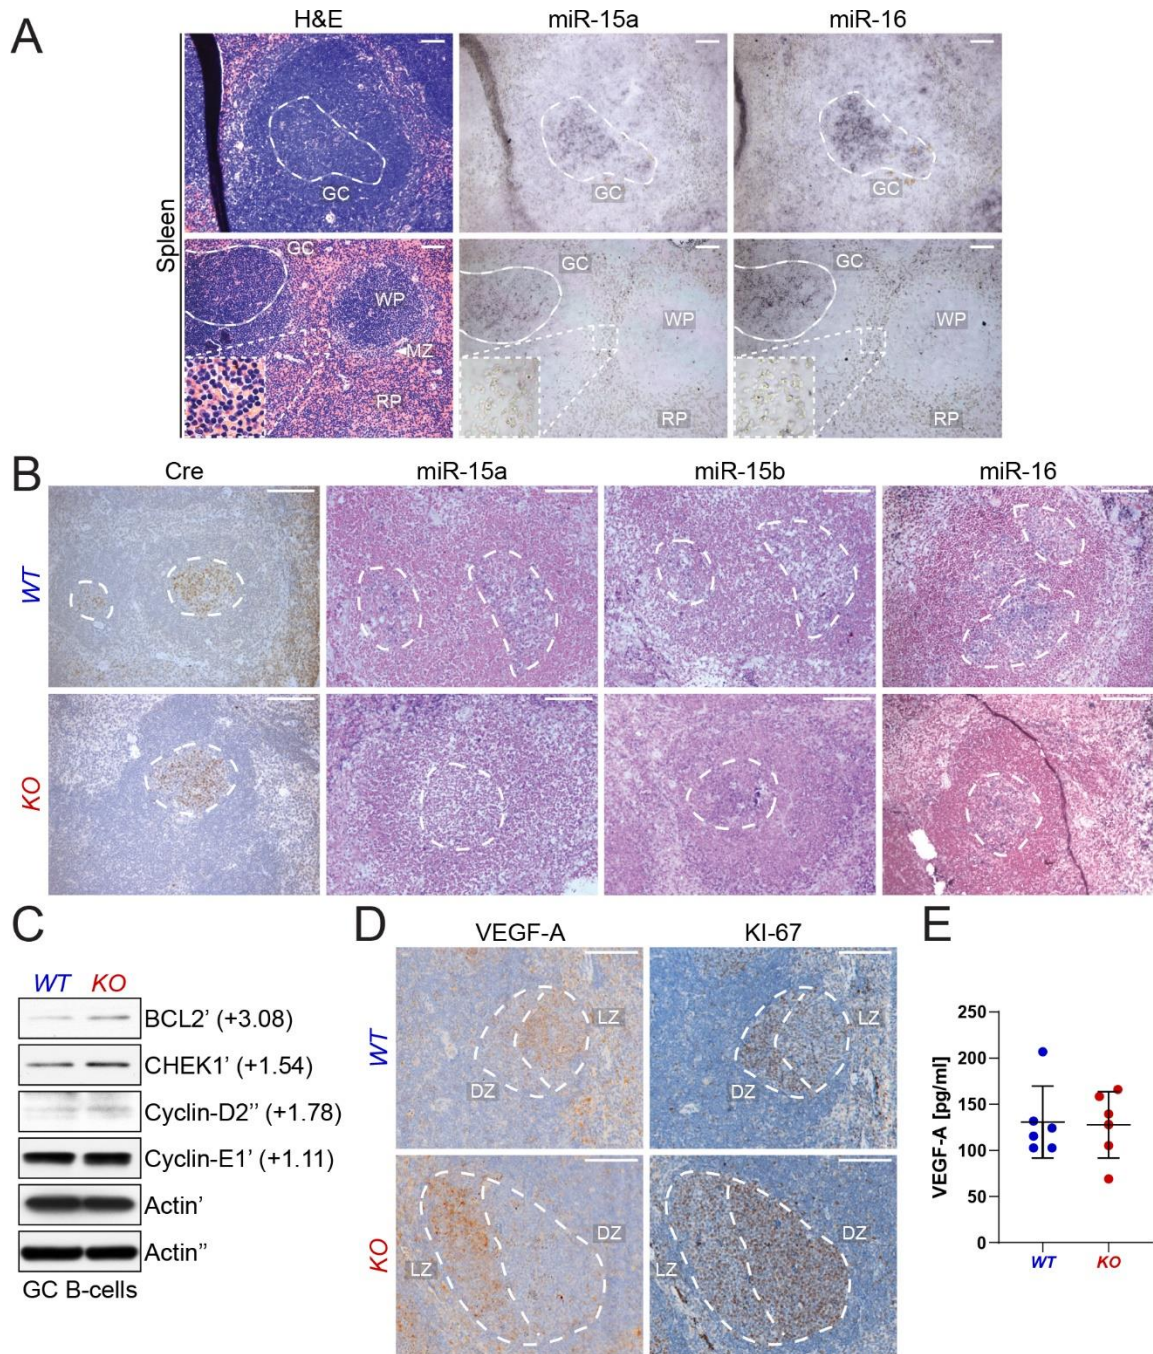

**Supplemental Figure 2. miR-15a/16 and their targets expression in murine GCs**

**(A)** Histologic and ISH analysis of miR-15a and miR-16 expression in the spleen of wild-type mouse. Note higher miR-15a and miR-16 expression in GCs within white pulp (WP) areas and lower expression in marginal zone (MZ) or follicular (Fo) B-cells. Note that birefringent red blood

cells in the red pulp (RP) area (insert) refract the light but do not stain positive for miR-15a or miR-16. H&E, hematoxylin and eosin. Scale bar = 50 $\mu$ m.

**(B)** Cre (IHC, brown) and miR-15a, miR-15b, and miR-16 expression (ISH, dark purple) in spleen sections of 12-week old *WT* and *KO* mice. One representative example of secondary follicle for each genotype is shown. Sections were counterstained with Giemsa (IHC) or Fast Red (ISH) to better identify lymphoid structures. GCs are highlighted by dotted lines, scale bars = 100 $\mu$ m.

**(C)** Changes in miR-15a/16 target genes expression after *miR-15a/16-1* cluster deletion in FACS-sorted GC B-cells (B220<sup>+</sup>CD95<sup>+</sup>CD38<sup>-</sup>) from mice with indicated genotypes assessed by immunoblotting. Quantitative differences in protein expression level based on densitometric analysis were normalized to actin and are shown in parentheses.

**(D)** IHC analysis of VEGF-A and Ki-67 expression within splenic GCs from mice with indicated genotypes. Note high and low VEGF-A abundance within the light zone (LZ) and the dark zone (DZ), respectively. Scale bar = 100 $\mu$ m.

**(E)** Plasma VEGF-A concentrations assessed using ELISA in *WT* (n=6) and *KO* (n=6) mice immunized with SRBC. Graphs depict the mean  $\pm$ SD.

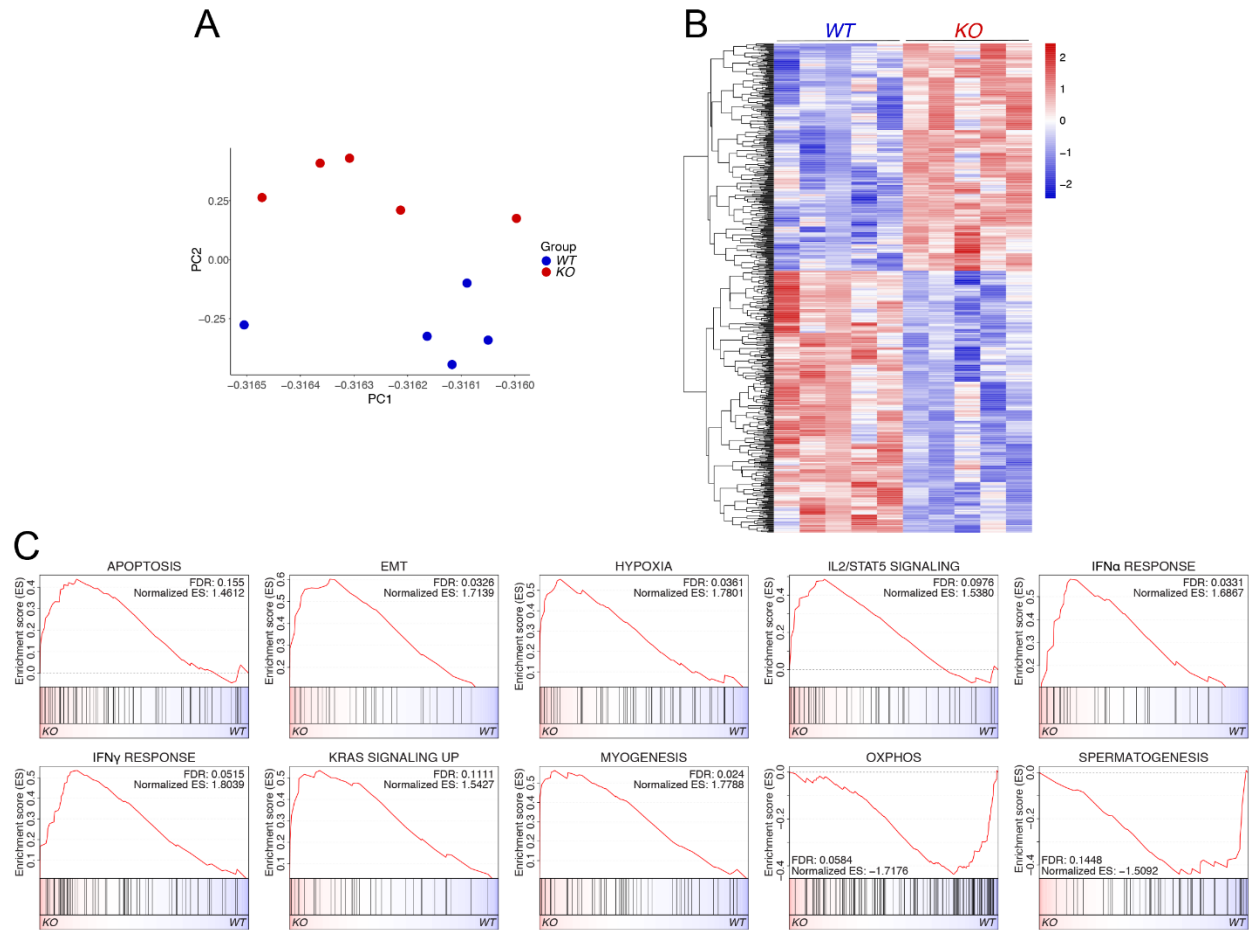

**Supplemental Figure 3. Analyses of proteomic changes induced by *miR-15a/16-1* loss in GB B-cells**

**(A)** Principal component analysis (PCA) plot of protein expression profiles of GC B-cells from WT (n=5) and KO (n=5) mice.

**(B)** Heatmap showing proteins differentially expressed between WT and KO GC B-cells (n=5 per group).

**(C)** GSEA mountain plots of ‘hallmark’ genesets enriched in WT or KO GC B-cells at FDR<0.2.

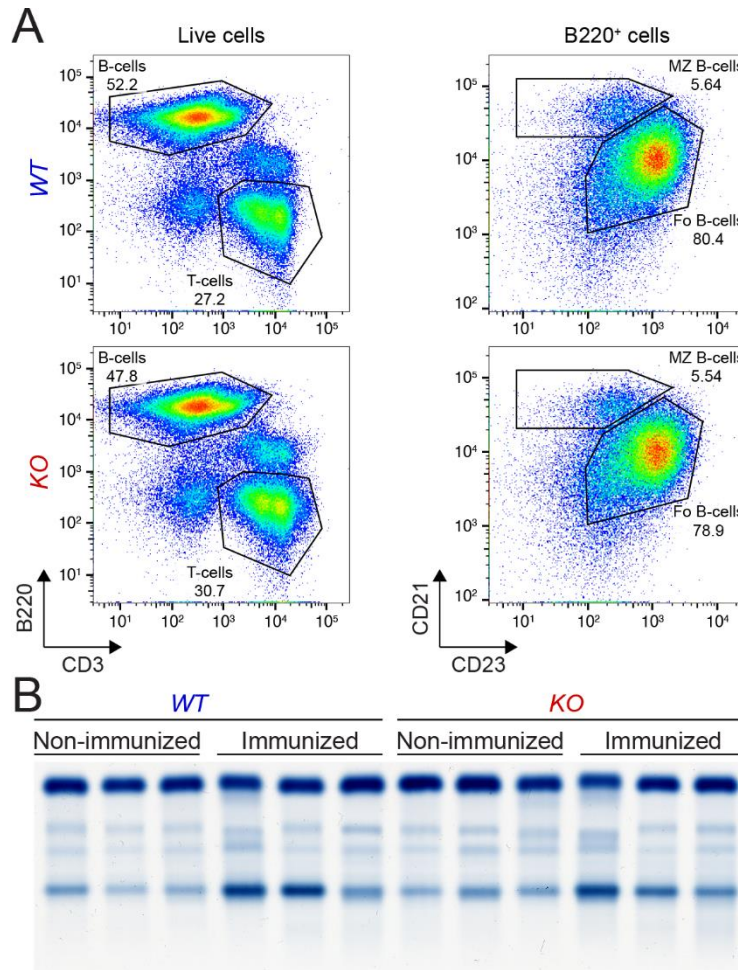

**Supplemental Figure 4. Analyses of serum proteins and lymphocyte subpopulations in *WT* and *KO* mice**

**(A)** Flow cytometric analysis of indicated lymphocyte subsets in the spleen of *WT* and *KO* mice immunized with SRBC. Three animals per group were analyzed. Representative dot plots are shown.

**(B)** Serum protein electrophoresis of young non- and SRBC-immunized *WT* and *KO* mice.

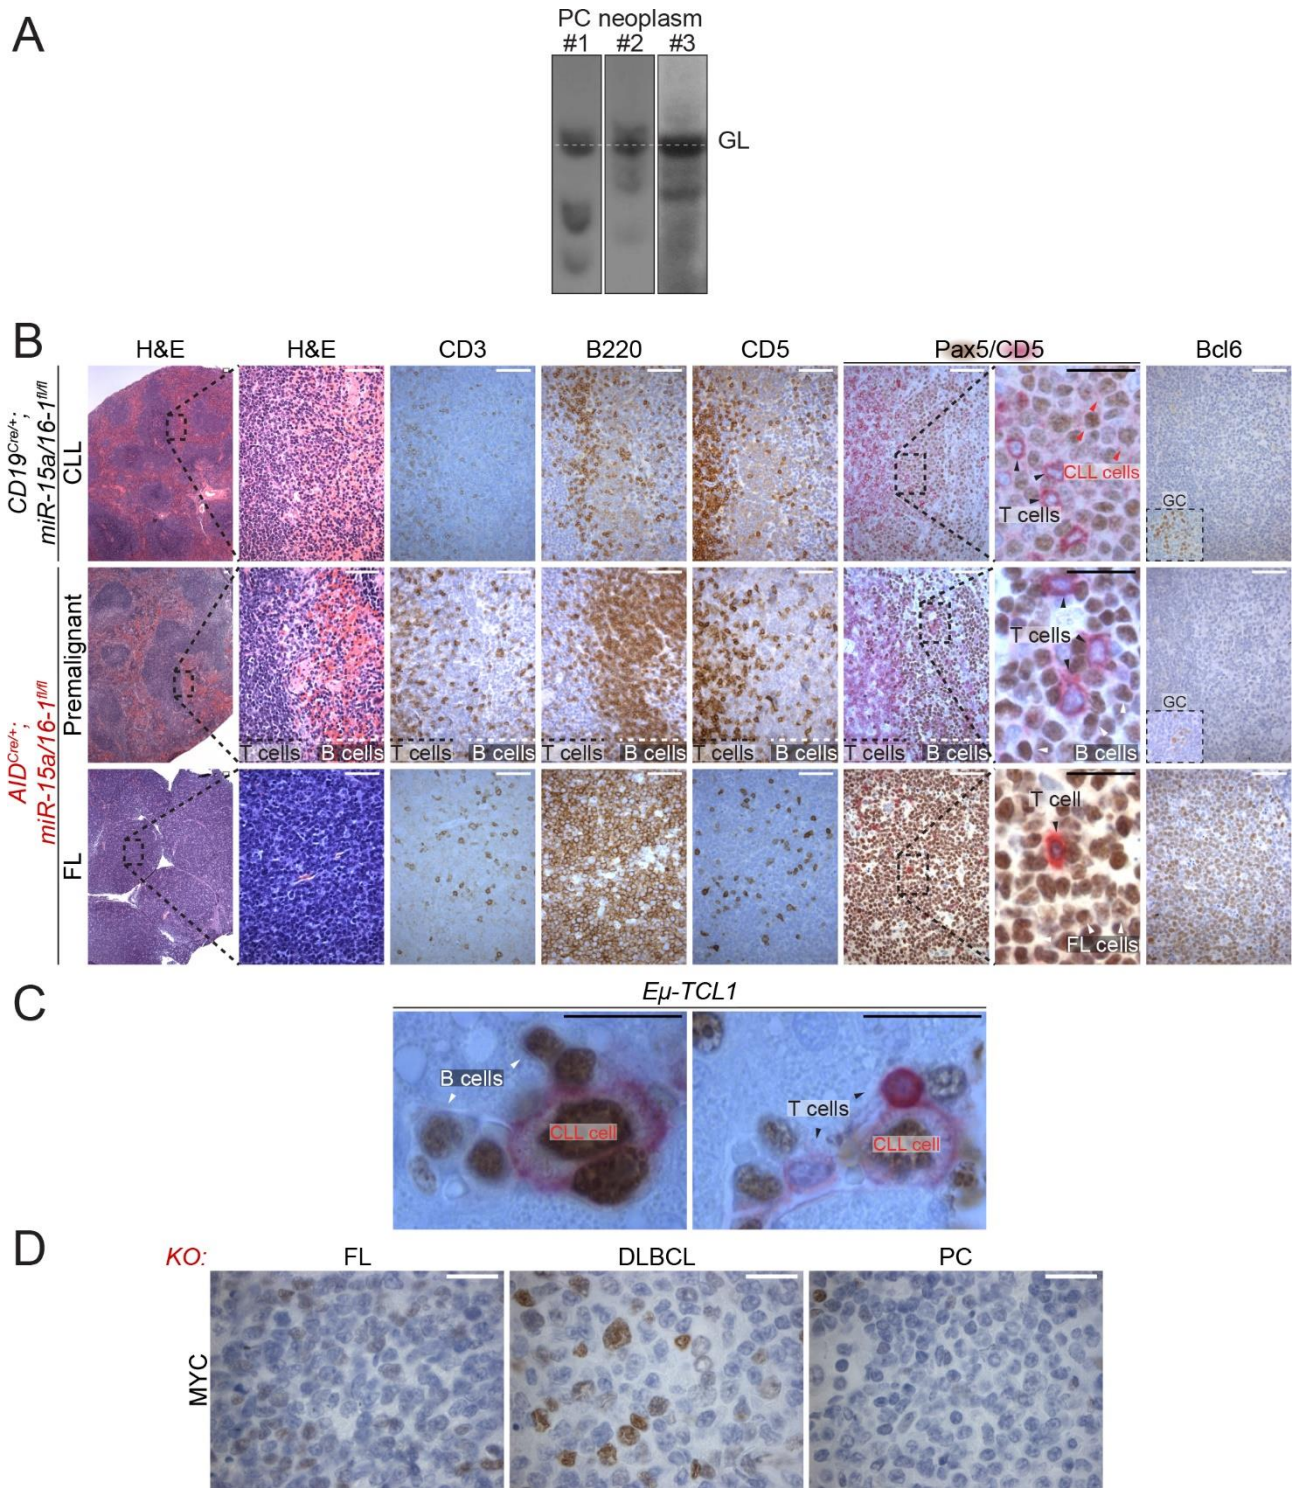

**Supplemental Figure 5. Clonality evaluation and immunophenotypic comparison of low-grade lymphomas in *AID<sup>Cre/+</sup>;**miR-15a/16-1<sup>fl/fl</sup>* and *CD19<sup>Cre/+</sup>;**miR-15a/16-1<sup>fl/fl</sup>* mice**

**(A)** Clonality evaluated by Southern blot analysis of the *IgH* gene in DNA isolated from spleens of *KO* mice with the plasma cell (PC) neoplasm. The non-rearranged germ line (GL) band (dashed gray line) and clonally rearranged bands were identified (arrowheads).

**(B)** Histologic and IHC stains of indicated markers on serial sections from a spleen of *CD19<sup>Cre/+</sup>;miR-15a/16-1<sup>fl/fl</sup>* mouse with CLL (top) and from a spleen of premalignant (middle) or a LN of FL-bearing (bottom) *AID<sup>Cre/+</sup>;miR-15a/16-1<sup>fl/fl</sup>* mouse. Pictures were taken at the junction between the T-cell and B-cell rich areas. H&E, hematoxylin and eosin. Scale bars: white = 50µm; black = 20µm.

**(C)** Specificity validation of IHC double-stain for mouse PAX5 (brown, nuclear) and CD5 (red, membrane) in *Eµ-TCL1* mouse.<sup>47</sup> Note red membrane and brown nuclear signal characteristic for CLL cells and single red or brown staining for B-cells and T-cells respectively. Scale bar = 20µm.

**(D)** IHC stains of MYC from representative *KO* mice with the indicated lymphoma phenotype. Scale bar = 20µm.



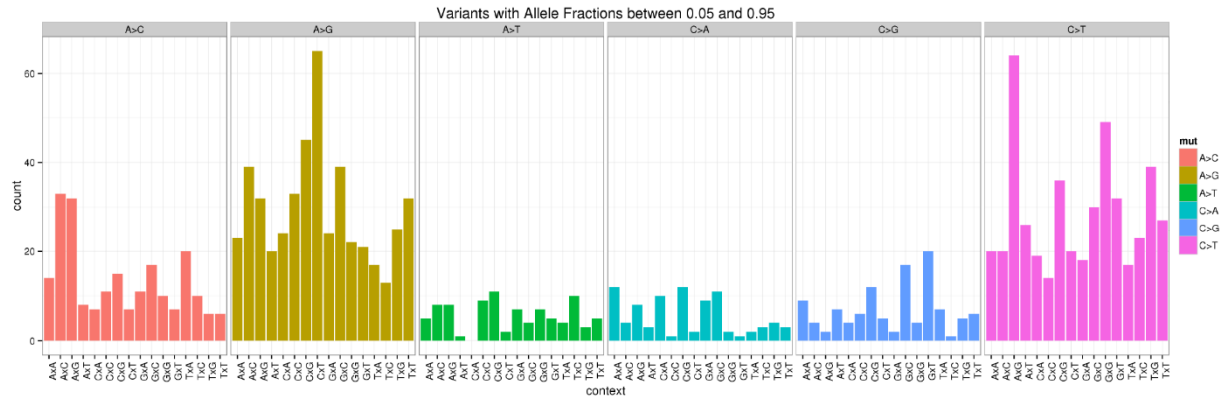

**Supplemental Figure 6. WES analysis of murine neoplasms from *KO* mice**

Mutation frequencies in the PC neoplasm and DLBCL from *KO* mice determined using WES.

Variants with allele fractions between 0.05 and 0.95 are shown.

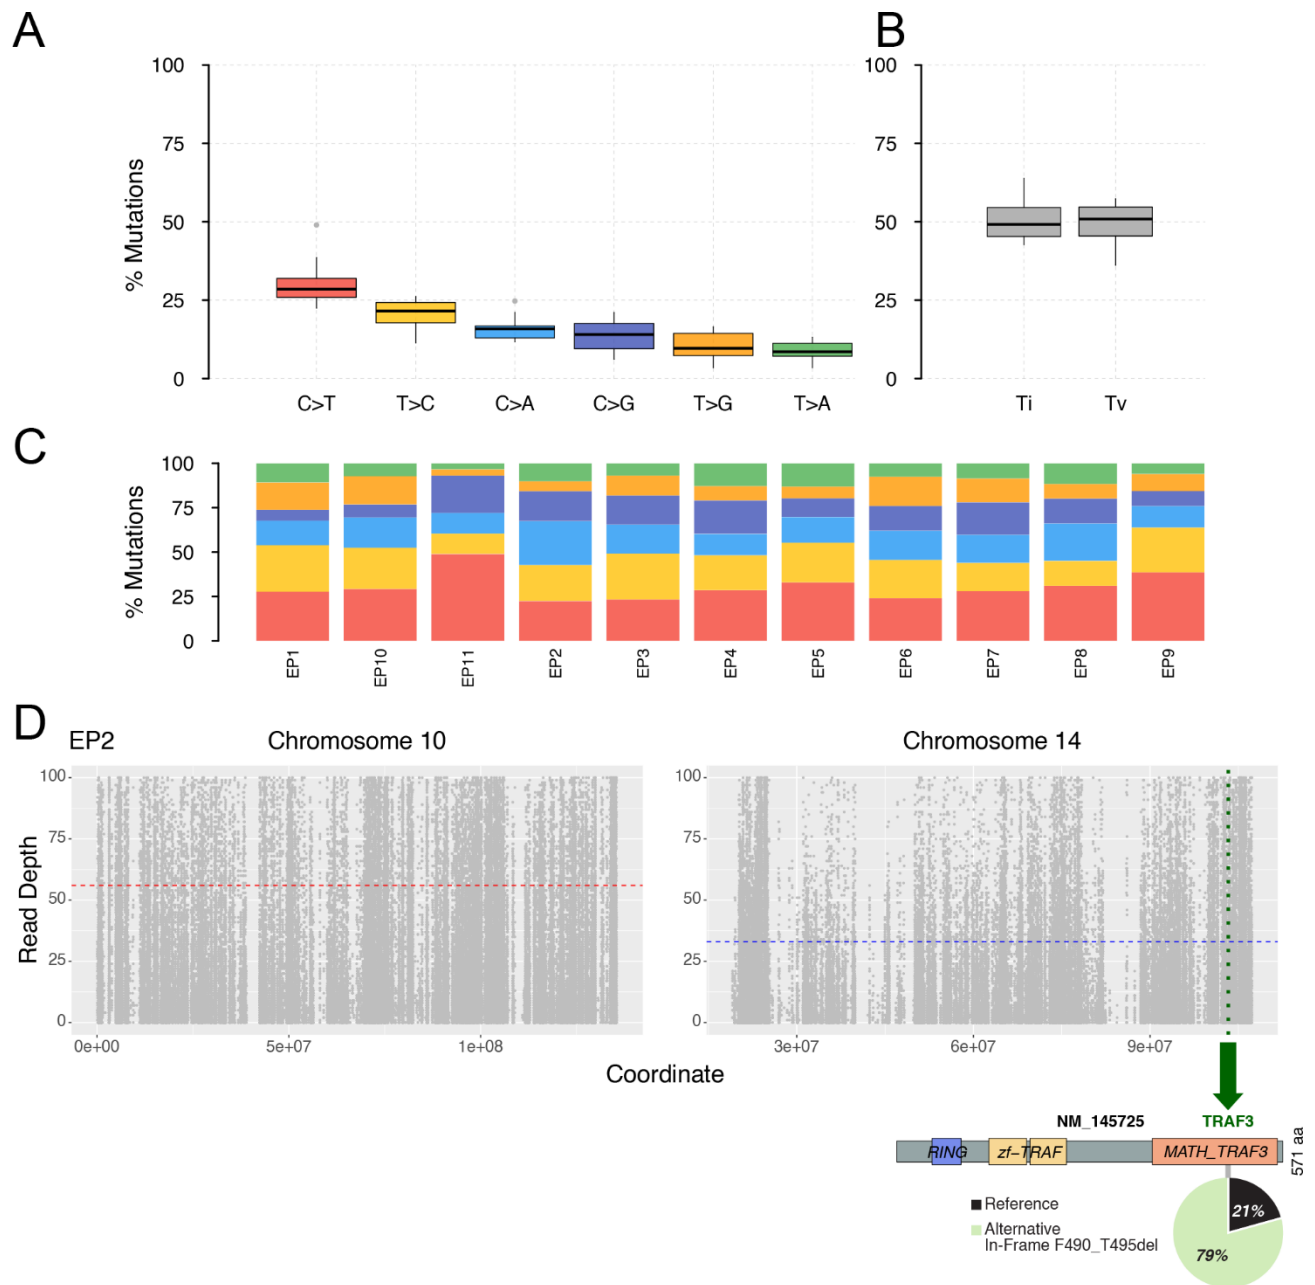

### Supplemental Figure 7. WES analysis of human EP

(A), (B), and (C) Summary of transition and transversion frequencies in human EP (n=11) determined using WES. Box plots show summary for six different conversions (A) and transitions vs transversions (B), whereas bar plot shows fractions in each sample (C).

(D) Representative case (EP2) of biallelic *TRAF3* inactivation. Top: plots illustrating the coverage of chromosomes 10 and 14. Red and blue dashed lines indicate mean coverage. Note almost

50% reduction of the mean coverage for chromosome 14, compared to diploid chromosome 10, suggesting a clonal loss. Dark green dashed line indicates location of *TRAF3* on chromosome 14. Bottom right: location of the *TRAF3* mutation in EP2 and its variant allele frequency (VAF) illustrated as a pie chart. Given the limited purity of FFPE samples, this VAF also suggests a clonal alteration; altogether indicating biallelic mechanism of inactivation.

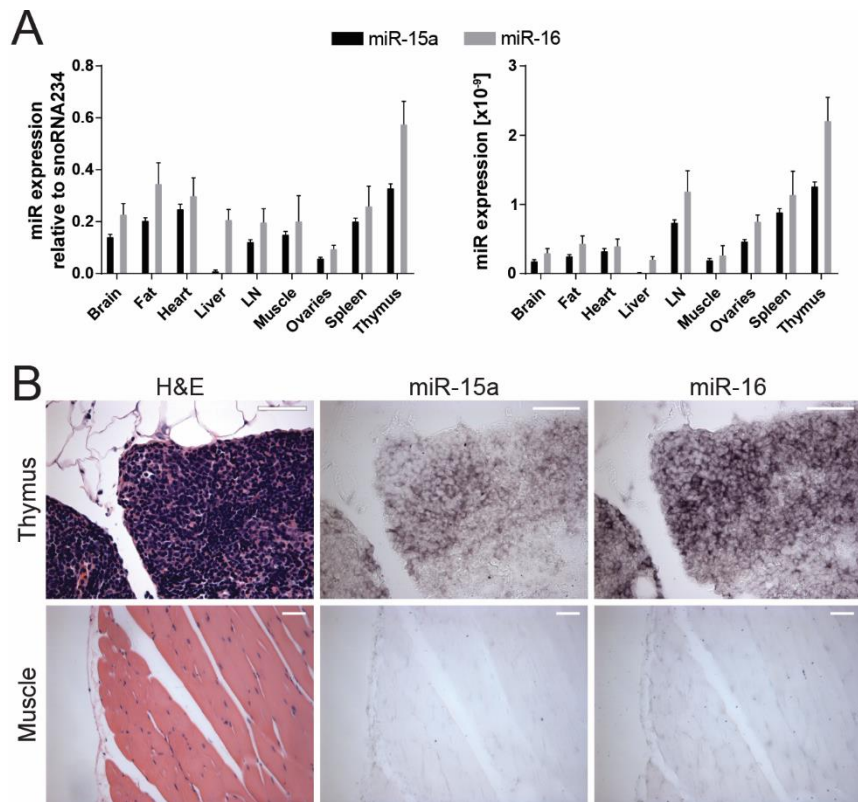

**Supplemental Figure 8. miR-15a and miR-16 expression pattern in mice**

**(A)** miR-15a and miR-16 expression determined using RT-qPCR relative to snoRNA234 (right) or unnormalized (left) in indicated tissues from a wild-type mouse. Error bars represent standard deviation of three independent replicates in a representative experiment.

**(B)** Histologic and ISH analysis of miR-15a and miR-16 expression in thymus and muscle used as positive and negative controls, respectively, during all ISH studies. H&E, hematoxylin and eosin. Scale bar = 50 $\mu$ m.

## Supplemental References

1. Lefranc MP, Giudicelli V, Duroux P, et al. IMGT(R), the international ImMunoGeneTics information system(R) 25 years on. *Nucleic Acids Res.* 2015;43(Database issue):D413-422.
2. Sewastianik T, Guerrera ML, Adler K, et al. Human MYD88L265P is insufficient by itself to drive neoplastic transformation in mature mouse B cells. *Blood Adv.* 2019;3(21):3360-3374.
3. Mayakonda A, Lin DC, Assenov Y, Plass C, Koeffler HP. Maftools: efficient and comprehensive analysis of somatic variants in cancer. *Genome Res.* 2018;28(11):1747-1756.
4. Gao J, Aksoy BA, Dogrusoz U, et al. Integrative analysis of complex cancer genomics and clinical profiles using the cBioPortal. *Sci Signal.* 2013;6(269):pl1.
5. Landau DA, Carter SL, Stojanov P, et al. Evolution and impact of subclonal mutations in chronic lymphocytic leukemia. *Cell.* 2013;152(4):714-726.
6. Landau DA, Tausch E, Taylor-Weiner AN, et al. Mutations driving CLL and their evolution in progression and relapse. *Nature.* 2015;526(7574):525-530.
7. Puente XS, Bea S, Valdes-Mas R, et al. Non-coding recurrent mutations in chronic lymphocytic leukaemia. *Nature.* 2015;526(7574):519-524.
8. Quesada V, Conde L, Villamor N, et al. Exome sequencing identifies recurrent mutations of the splicing factor SF3B1 gene in chronic lymphocytic leukemia. *Nat Genet.* 2011;44(1):47-52.
9. da Silva Almeida AC, Abate F, Khiabani H, et al. The mutational landscape of cutaneous T cell lymphoma and Sezary syndrome. *Nat Genet.* 2015;47(12):1465-1470.
10. Chapuy B, Stewart C, Dunford AJ, et al. Molecular subtypes of diffuse large B cell lymphoma are associated with distinct pathogenic mechanisms and outcomes. *Nat Med.* 2018;24(5):679-690.
11. Lohr JG, Stojanov P, Lawrence MS, et al. Discovery and prioritization of somatic mutations in diffuse large B-cell lymphoma (DLBCL) by whole-exome sequencing. *Proc Natl Acad Sci U S A.* 2012;109(10):3879-3884.
12. Reddy A, Zhang J, Davis NS, et al. Genetic and Functional Drivers of Diffuse Large B Cell Lymphoma. *Cell.* 2017;171(2):481-494 e415.
13. Morin RD, Mungall K, Pleasance E, et al. Mutational and structural analysis of diffuse large B-cell lymphoma using whole-genome sequencing. *Blood.* 2013;122(7):1256-1265.
14. Bea S, Valdes-Mas R, Navarro A, et al. Landscape of somatic mutations and clonal evolution in mantle cell lymphoma. *Proc Natl Acad Sci U S A.* 2013;110(45):18250-18255.
15. Lohr JG, Stojanov P, Carter SL, et al. Widespread genetic heterogeneity in multiple myeloma: implications for targeted therapy. *Cancer Cell.* 2014;25(1):91-101.
16. Morin RD, Mendez-Lago M, Mungall AJ, et al. Frequent mutation of histone-modifying genes in non-Hodgkin lymphoma. *Nature.* 2011;476(7360):298-303.
17. Braggio E, Van Wier S, Ojha J, et al. Genome-Wide Analysis Uncovers Novel Recurrent Alterations in Primary Central Nervous System Lymphomas. *Clin Cancer Res.* 2015;21(17):3986-3994.
18. Li H, Durbin R. Fast and accurate short read alignment with Burrows-Wheeler transform. *Bioinformatics.* 2009;25(14):1754-1760.
19. McKenna A, Hanna M, Banks E, et al. The Genome Analysis Toolkit: a MapReduce framework for analyzing next-generation DNA sequencing data. *Genome Res.* 2010;20(9):1297-1303.

20. DePristo MA, Banks E, Poplin R, et al. A framework for variation discovery and genotyping using next-generation DNA sequencing data. *Nat Genet.* 2011;43(5):491-498.
21. McLaren W, Gil L, Hunt SE, et al. The Ensembl Variant Effect Predictor. *Genome Biol.* 2016;17(1):122.
22. Kandoth C. vcf2maf v1.6.16; 2018.
23. Sherry ST, Ward MH, Kholodov M, et al. dbSNP: the NCBI database of genetic variation. *Nucleic Acids Res.* 2001;29(1):308-311.
24. Karczewski KJ, Francioli LC, Tiao G, et al. The mutational constraint spectrum quantified from variation in 141,456 humans. *Nature.* 2020;581(7809):434-443.
25. Tate JG, Bamford S, Jubb HC, et al. COSMIC: the Catalogue Of Somatic Mutations In Cancer. *Nucleic Acids Res.* 2019;47(D1):D941-D947.
26. Cerami E, Gao J, Dogrusoz U, et al. The cBio cancer genomics portal: an open platform for exploring multidimensional cancer genomics data. *Cancer Discov.* 2012;2(5):401-404.
27. R Development Core Team. R: A Language and Environment for Statistical Computing. Vienna, Austria R Foundation for Statistical Computing; 2010.
28. Wickham H. Ggplot2 : elegant graphics for data analysis (ed Second): Springer; 2016.
29. Samur MK, Aktas Samur A, Fulciniti M, et al. Genome-Wide Somatic Alterations in Multiple Myeloma Reveal a Superior Outcome Group. *J Clin Oncol.* 2020:JCO2000461.
30. Walker BA, Mavrommatis K, Wardell CP, et al. Identification of novel mutational drivers reveals oncogene dependencies in multiple myeloma. *Blood.* 2018;132(6):587-597.
31. Krzywinski M, Schein J, Birol I, et al. Circos: an information aesthetic for comparative genomics. *Genome Res.* 2009;19(9):1639-1645.
32. Cheong WH, Tan YC, Yap SJ, Ng KP. ClicO FS: an interactive web-based service of Circos. *Bioinformatics.* 2015;31(22):3685-3687.
33. Li H, Handsaker B, Wysoker A, et al. The Sequence Alignment/Map format and SAMtools. *Bioinformatics.* 2009;25(16):2078-2079.
34. Kall L, Storey JD, Noble WS. Non-parametric estimation of posterior error probabilities associated with peptides identified by tandem mass spectrometry. *Bioinformatics.* 2008;24(16):i42-48.
35. Gatto L, Lilley KS. MSnbase-an R/Bioconductor package for isobaric tagged mass spectrometry data visualization, processing and quantitation. *Bioinformatics.* 2012;28(2):288-289.
36. Huber W, Carey VJ, Gentleman R, et al. Orchestrating high-throughput genomic analysis with Bioconductor. *Nat Methods.* 2015;12(2):115-121.
37. Huber W, von Heydebreck A, Sultmann H, Poustka A, Vingron M. Variance stabilization applied to microarray data calibration and to the quantification of differential expression. *Bioinformatics.* 2002;18 Suppl 1:S96-104.
38. Ritchie ME, Phipson B, Wu D, et al. limma powers differential expression analyses for RNA-sequencing and microarray studies. *Nucleic Acids Res.* 2015;43(7):e47.
39. Licursi V, Conte F, Ficon G, Paci P. MIENTURNET: an interactive web tool for microRNA-target enrichment and network-based analysis. *BMC Bioinformatics.* 2019;20(1):545.
40. Agarwal V, Bell GW, Nam JW, Bartel DP. Predicting effective microRNA target sites in mammalian mRNAs. *Elife.* 2015;4.

41. Zhou Y, Zhou B, Pache L, et al. Metascape provides a biologist-oriented resource for the analysis of systems-level datasets. *Nat Commun.* 2019;10(1):1523.
42. Victora GD, Dominguez-Sola D, Holmes AB, Deroubaix S, Dalla-Favera R, Nussenzweig MC. Identification of human germinal center light and dark zone cells and their relationship to human B-cell lymphomas. *Blood.* 2012;120(11):2240-2248.
43. Kaji T, Ishige A, Hikida M, et al. Distinct cellular pathways select germline-encoded and somatically mutated antibodies into immunological memory. *J Exp Med.* 2012;209(11):2079-2097.
44. Subramanian A, Tamayo P, Mootha VK, et al. Gene set enrichment analysis: a knowledge-based approach for interpreting genome-wide expression profiles. *Proc Natl Acad Sci U S A.* 2005;102(43):15545-15550.
45. Liberzon A, Birger C, Thorvaldsdottir H, Ghandi M, Mesirov JP, Tamayo P. The Molecular Signatures Database (MSigDB) hallmark gene set collection. *Cell Syst.* 2015;1(6):417-425.
46. Kolde R. pheatmap: Pretty Heatmaps. Vol. 2017; 2015:Implementation of heatmaps that offers more control over dimensions and appearance.
47. Gorgun G, Ramsay AG, Holderried TA, et al. E(mu)-TCL1 mice represent a model for immunotherapeutic reversal of chronic lymphocytic leukemia-induced T-cell dysfunction. *Proc Natl Acad Sci U S A.* 2009;106(15):6250-6255.
